# Supplementary material for: Multiscale causal networks identify VGF as a key regulator of Alzheimer’s disease
Source: PubMed Central journal article supplement (PMC7414858; doi:10.1038/s41467-020-17405-z), 2020-08-07
Supplement: 41467_2020_17405_MOESM1_ESM.pdf [file 41467_2020_17405_MOESM1_ESM.pdf]

## 1 **Supplementary Information**

### 2 **Multiscale causal networks identify VGF as a key regulator of Alzheimer's** 3 **disease**

4 Noam D. Beckmann et al.

## 6 **Supplementary Strategy Overview**

7 As described in the main text, we employed a probabilistic causal network framework to  
8 construct predictive models of AD. The input data to construct these models were generated as  
9 part of the AMP-AD consortium, and included whole exome sequencing (WES), RNA  
10 sequencing (RNA-seq, referred to as gene-expression hereafter), and protein-expression data  
11 from the anterior prefrontal cortex (Brodmann area 10, BM10) in a large cohort of post-mortem  
12 samples from the Mount Sinai Brain Bank (MSBB, N=364, with 307 having both DNA and  
13 RNA, 217 both DNA and protein, and 217 having all three), across the complete spectrum of AD  
14 clinical and neuropathological traits (from controls to neuropathologically-proven AD, Fig. 1a)  
15 and with no other co-morbidities<sup>1</sup>. To focus the input of molecular traits for network  
16 reconstruction on traits associated with AD, we examined associations between the molecular  
17 data and AD clinical and neuropathological features to identify AD gene- and protein-  
18 expression signatures. Gene- and protein- expression traits co-regulated with these AD signatures  
19 were found by constructing gene and protein co-expression networks. From these networks we  
20 identified highly interconnected sets of co-regulated genes (modules) that were significantly  
21 enriched for the AD signatures and for pathways previously implicated in AD (Fig. 1b). To  
22 obtain a final set of genes for input into the causal network reconstructions, we combined genes  
23 in the AD signatures and genes in the co-expression network modules enriched for these  
24 signatures (referred to here as the seed set). We further expanded this seed set by incorporating  
25 prior pathway knowledge from the literature to ensure inclusion of important AD genes  
26 potentially missed due differential expression analyses lack of power (Fig. 1b).

27 With our AD-centered input set of genes for network reconstructions defined, we mapped  
28 gene and protein quantitative trait loci (eQTLs and pQTLs, respectively) for expression traits in  
29 this set to incorporate QTLs as structure priors in the network reconstructions, given they  
30 provide a systematic perturbation source that can boost power to infer causal relationships (Fig.  
31 1c) (Supplementary Table 1). The input gene set and eQTL/pQTL data from MSBB served as  
32 input into RIMBANET to construct probabilistic causal networks of AD (Fig. 1d). An artificial  
33 intelligence algorithm to detect KD genes from these network structures was then applied to  
34 identify and prioritize causal regulators of AD networks (Fig. 1d). To validate our findings, three  
35 independent approaches were employed: 1) Replication in other brain regions and independent  
36 datasets (Fig. 1e); 2) Association of human genetic risk for AD and expression of KD genes (Fig.  
37 1f); and 3) For the top causal regulator, VGF, functional and molecular experimental validation  
38 in the 5xFAD mouse model (Fig. 1g).

39

## 40 **Supplementary Results**

41 **Co-expression networks partition RNA and Protein expression traits into separate**  
42 **modules.** The construction of co-expression networks from combining gene- and protein-  
43 expression traits resulted in modules comprised nearly exclusively of one type of data (either  
44 gene or protein expression) (Supplementary Data 3). While technical components of variation  
45 specific to technologies used to score gene- and protein-expression will partly explain this  
46 pattern of co-expression, given traits of a particular type are more correlated to traits of that same  
47 type than traits of other types, the complementarity of gene- and protein-expression plays a role  
48 as well. For example, while RNA measures generally reflect expression levels in cells local to  
49 the brain region assayed, select RNAs or RNA isoforms that are known to be transported into  
50 dendrites (e.g. BDNF long 3' UTR mRNA) could potentially contribute to this signal as well<sup>2-4</sup>.  
51 Similarly, protein measures may reflect proteins synthesized in the local brain region that was  
52 profiled, proteins that are transported in secretory vesicles via neural pathways from cell bodies  
53 in distal regions, and proteins that are locally translated from mRNAs transported from distal  
54 regions. Thus, simultaneous sampling of RNA and protein expression in a specific brain region  
55 provides complementary data sets that not only reflect linear DNA to RNA to protein synthesis,  
56 but that also capture dynamic changes in the flux of transported proteins and RNAs into the local  
57 region.

58

59 **Supplementary Figures**

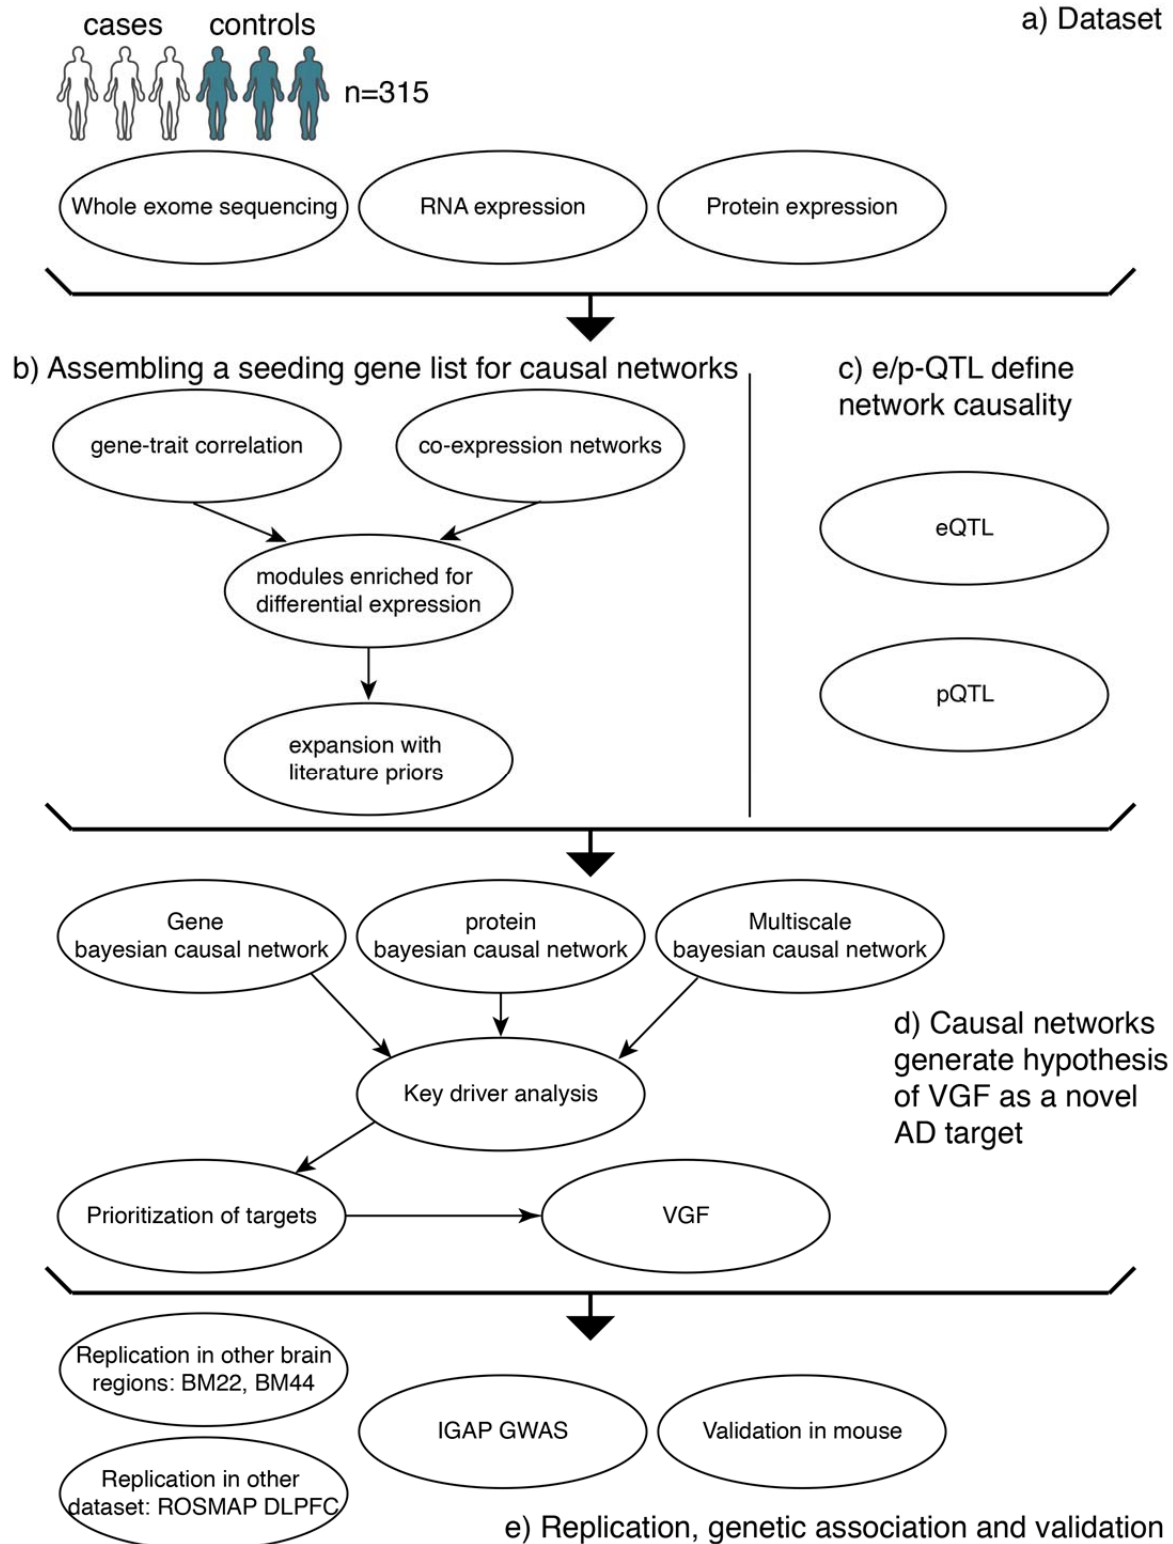

60

61 **Supplementary Fig. 1.**

62 **Simplified Pipeline Overview.** Simplified description of data and analyses workflows  
 63 performed to identify and validate VGF as a target of AD.

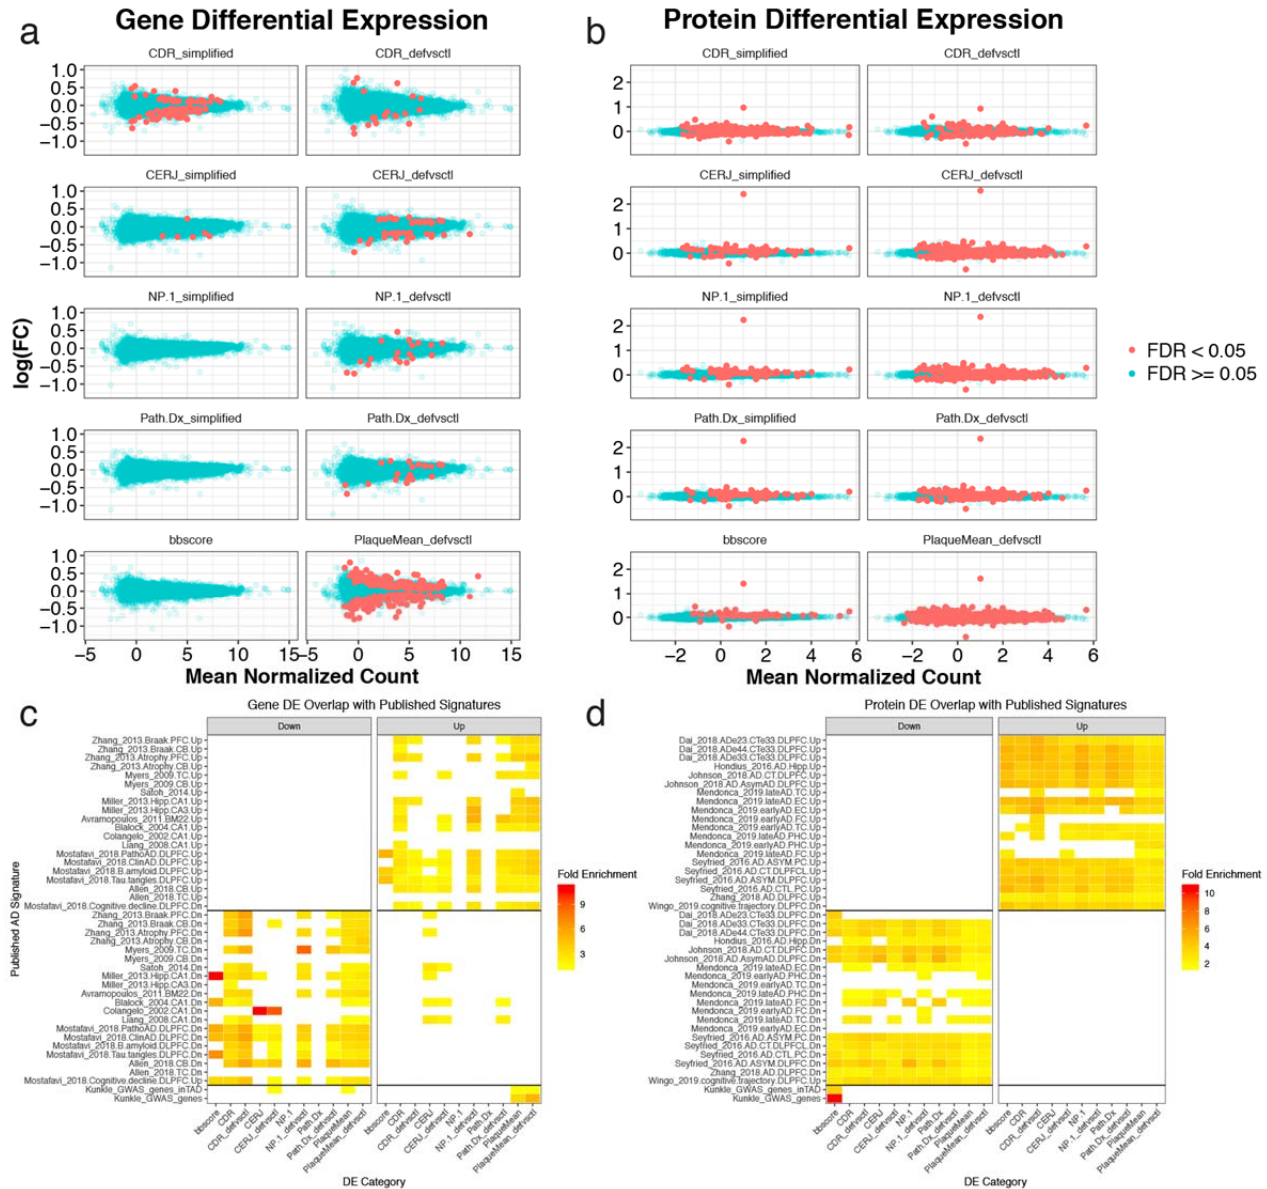

64

65 **Supplementary Fig. 2.**

66 **Other AD traits gene and protein DE. a and b** Gene **a** and protein **b** differential expression:

67 The x axis of this plot is the mean normalized count for each gene or protein, and the y axis the

68 log(FC). In blue are the non-significantly DE genes or proteins and in red the significant ones.

69 Each box corresponds to a trait. **c and d** Heatmaps of gene **c** and protein **d** differential expression

70 gene set enrichment analysis for published differential expression signatures, AD GWAS

71 mapped genes, and genes in topologically associated domains containing AD GWAS loci

72 (defined as  $R^2 > 0.5$  from lead SNP). The x axes of these plots represent the DE signatures in our

73 dataset and in the y axes are the public DE signatures. Genes and proteins were included in the

74 analysis if they had association to AD traits with  $FDR < 0.25$ . Heatmap shows the fold

75 enrichment (yellow to red) for only the significantly (Bonferroni adjusted p-value < 0.05)

76 enriched public AD signatures.

77

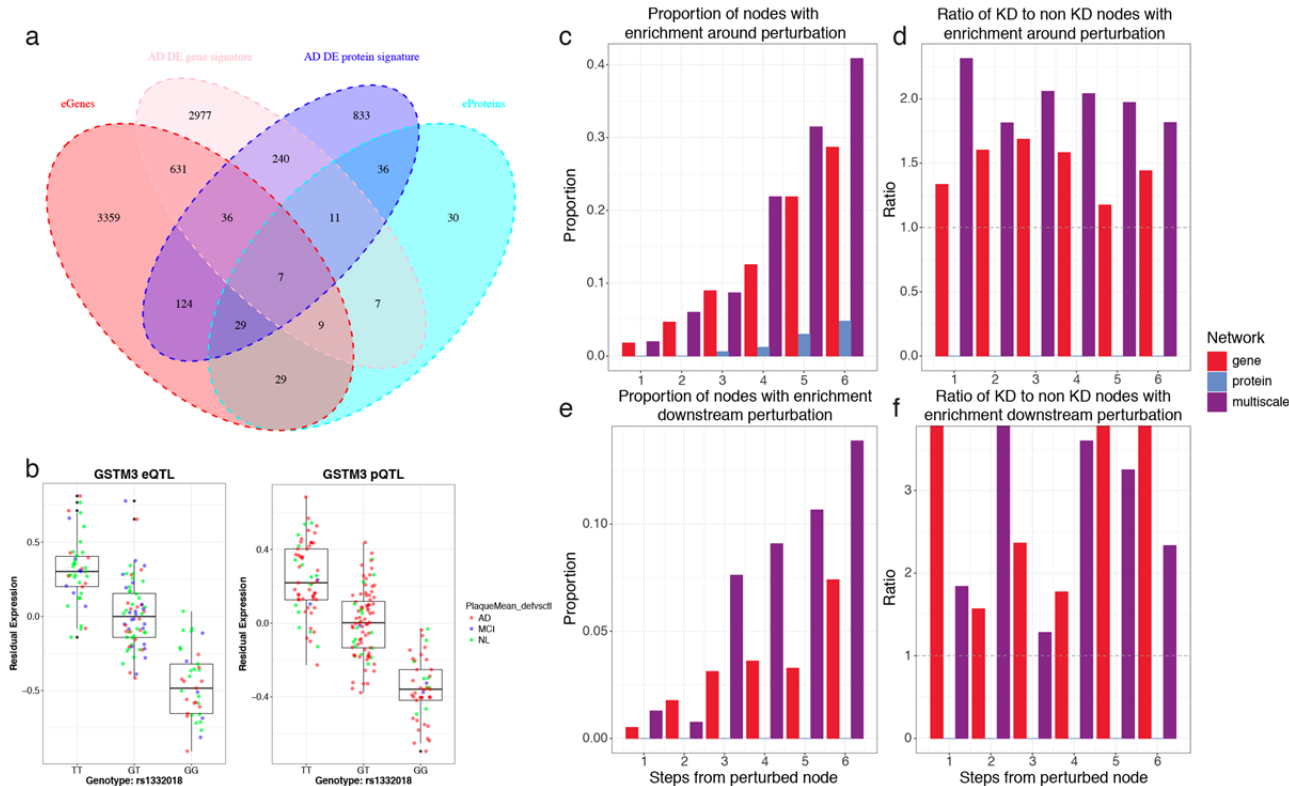

78

79 **Supplementary Fig. 3.**

80 **QTL analyses and molecular validation of BN subnetworks.** **a** Venn diagram of QTL overlap  
 81 with expanded DE signatures. **b** Boxplots of QTL effects: GSTM3, gene that shares an eQTL  
 82 and a pQTL at the same SNP position. **c, d, e and f** Enrichment of 742 unique perturbation (341  
 83 unique genes) signatures onto networks. In each case, the color represents the network in which  
 84 the analysis is performed. **a and c** Proportion of nodes with existing signature and significant  
 85 enrichment for said signature in network neighborhood **a** undirected enrichment - and **c**  
 86 downstream enrichment. The x axis is the number of steps away from the perturbed node and the  
 87 y axis the proportion of nodes with significant enrichment at FDR<0.05. **b and d** Ratio of global  
 88 KDs with significant enrichment to non-KDs with significant enrichment in network  
 89 neighborhood **b** undirected enrichment and **d** downstream enrichment. The x axis is the number  
 90 of steps away from the perturbed node and the y axis the ratio of proportions of KDs with  
 91 significant enrichment at FDR<0.05 to proportion of non-KDs with significant enrichment at  
 92 FDR<0.05. Bars reaching top of plot indicate 0 significant non-KD enrichment.

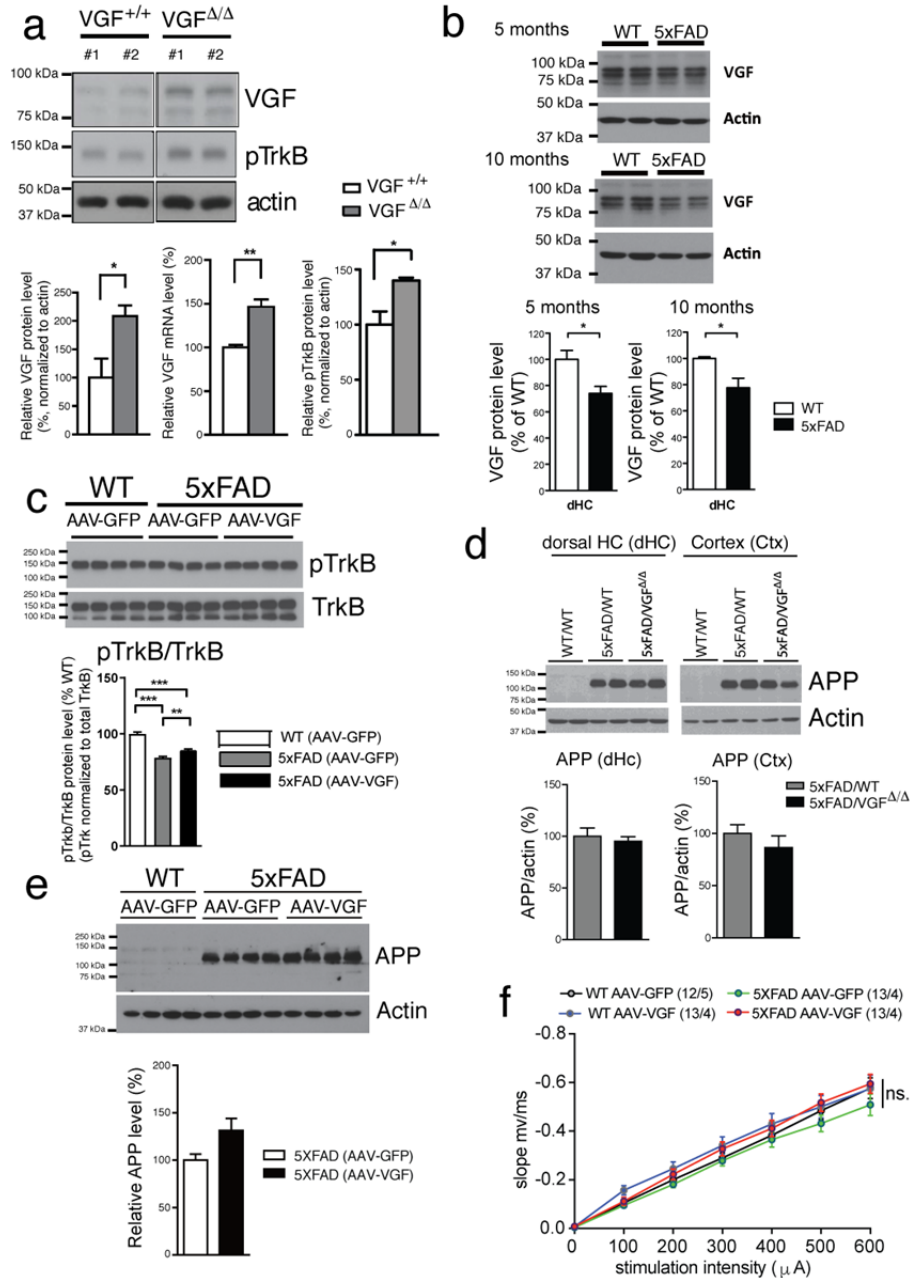

93

94 **Supplementary Fig. 4.**

95 **Levels of APP expression and baseline synaptic function in WT and 5xFAD mice with VGF**

96 **overexpression.** **a** Increased VGF expression in the brains of VGF germline overexpression

97 mouse line (VGF<sup>Δ/Δ</sup>). Western blot and quantitative PCR analysis showed both increased VGF

98 protein and mRNA level, and increased pTrkB levels, in the dorsal hippocampus of VGF

99 germline overexpression mice (VGF<sup>Δ/Δ</sup>) compared to WT (N=3 mice per group, hippocampus

100 VGF protein: VGF<sup>Δ/Δ</sup>: 208.6±18.4%; WT: 100.0±33.7%; hippocampus Vgf mRNA: VGF<sup>Δ/Δ</sup>:

101 146.6±8.4%; WT: 100.1±3.0%, hippocampus pTrkB protein: VGF<sup>Δ/Δ</sup>: 139.9±2.7%; WT:

102 100.0±11.9%; Student t-test, \*, p<0.05; \*\*, p<0.01. **b** VGF protein levels are reduced in the

103 dorsal hippocampus of 5xFAD mice, at 5 months and 10 months of age. Dorsal hippocampus of

104 male 5xFAD and WT control mice was collected and analyzed by western blotting for VGF  
105 protein (migrating as a characteristic doublet of ~90kd). dHC, dorsal hippocampus. 5-month old,  
106 N=4~5 mice per group; 10-month old, N=4 mice per group. Hippocampal VGF protein levels: 5-  
107 month, WT:  $100.0 \pm 6.8\%$ ; 5xFAD:  $74.1 \pm 5.1\%$ ; 10-month, WT:  $100.0 \pm 1.2\%$ ; 5xFAD:  $77.8 \pm$   
108  $7.1\%$  Student t-test, \*,  $p < 0.05$ . **c** Partial rescue of pTrkB/TrkB levels in the brains of 5xFAD  
109 mice overexpressing VGF. Dorsal hippocampus of male 5xFAD and WT control mice was  
110 infected with AAV-VGF or AAV-GFP at ~2-3 months of age, and brain lysates were analyzed  
111 for phospho-TrkB (pTrkB) and total TrkB at ~7 months of age. N=4-5 male mice per group.  
112 Data were analyzed by one-way ANOVA with Newman-Keuls post hoc analysis. \*\*:  $p < 0.01$ ,  
113 \*\*\*:  $p < 0.001$ . **d** Similar expression levels of transgenic APP protein in both cortex and dorsal  
114 hippocampus of 5xFAD mouse brain with VGF germline overexpression. N=4 mice per group,  
115 10 month old. **e** No significant difference of transgenic APP protein levels in the dorsal  
116 hippocampus of 5xFAD mouse brain with AAV-VGF overexpression. N=4 mice/per group, 10  
117 month old. **f** Analysis of synaptic responses in the dHc of 8-9 month old 5xFAD and WT mice  
118 treated with AAV-VGF or AAV-GFP. Input/output curve expressed as fEPSP slope (mV/ms)  
119 plotted against stimulus intensity ( $\mu$ A) did not show differences in baseline synaptic strength  
120 between groups. N: WT (AAV-GFP) = 12 slices from 5 mice; 5xFAD (AAV-GFP) = 13 slices  
121 from 4 mice; WT (AAV-VGF) = 13 slices from 4 mice; 5xFAD (AAV-VGF) = 13 slices from 4  
122 mice. Two-way ANOVA and Bonferroni post-hoc tests.

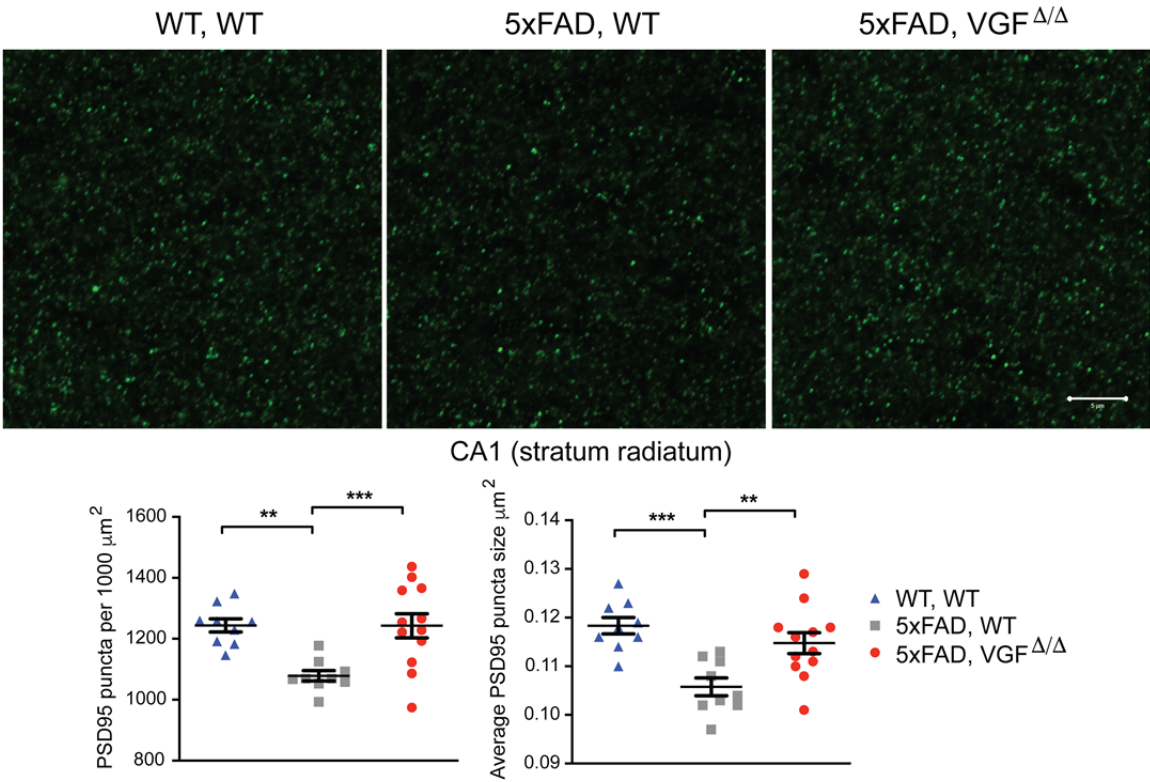

123

124 **Supplementary Fig. 5.**

125 **Increased levels of PSD95 (post-synaptic density 95) in hippocampus of VGF-overexpressing**

126 **5xFAD,VGF<sup>Δ/Δ</sup> compared to 5xFAD.** Levels of PSD-95 (average puncta size and puncta per 1000  $\mu\text{m}^2$ )

127 were quantified in CA1 area (stratum radiatum); n=3~4 10-month old male mice per group; 3 random

128 fields per CA1 per brain, N=9-12; One-way ANOVA with Newman-Keuls posthoc analysis; \*\*, p<0.01\*\*\*,

129 p<0.001; Green:PSD-95 ; Scale bar: 5 $\mu\text{m}$ .



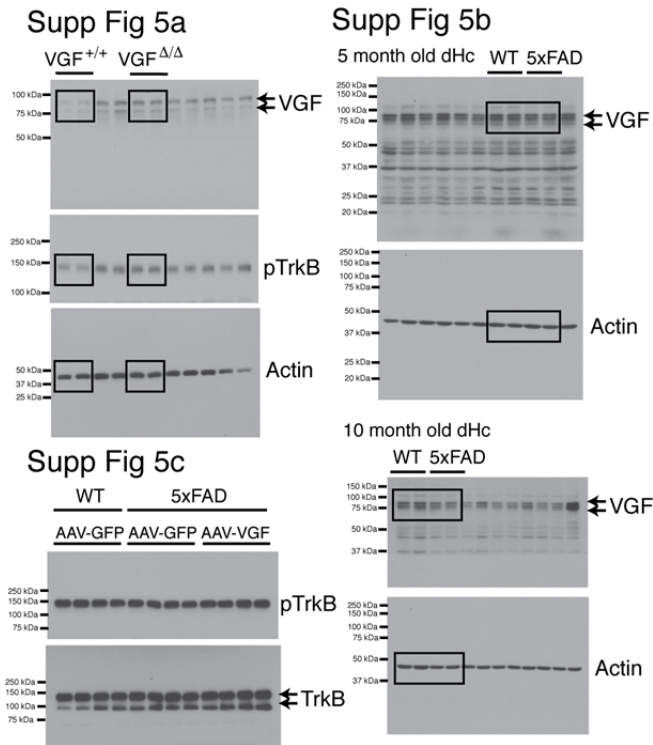

130

131 **Supplementary Fig. 6.**

132 **Full length western blots of Supplementary Figure 5a-5c.** Lanes shown in Figure 5a-c are highlighted by  
 133 the black rectangles.

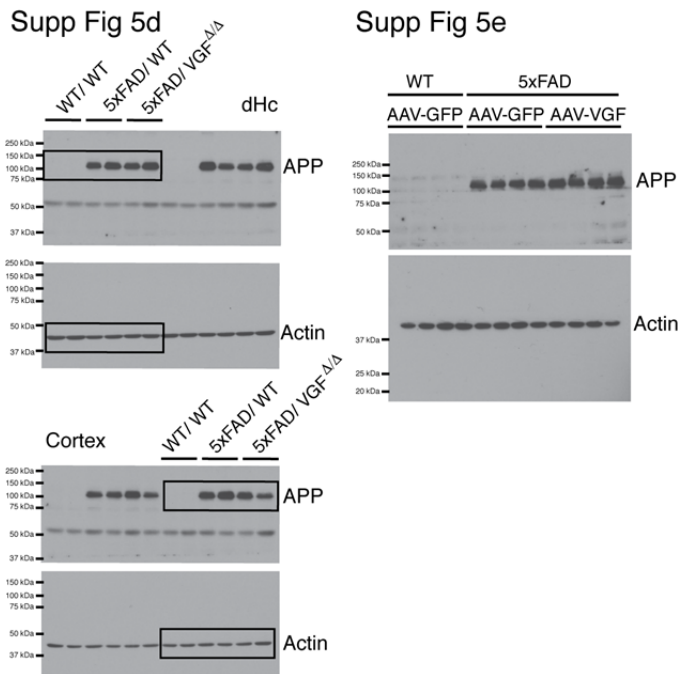

134

135 **Supplementary Fig. 7.**

136 **Full length western blots of Supplementary Figure 5d-5e.** Lanes shown in Figure 5 are highlighted by

137 the black rectangles.  
138  
139

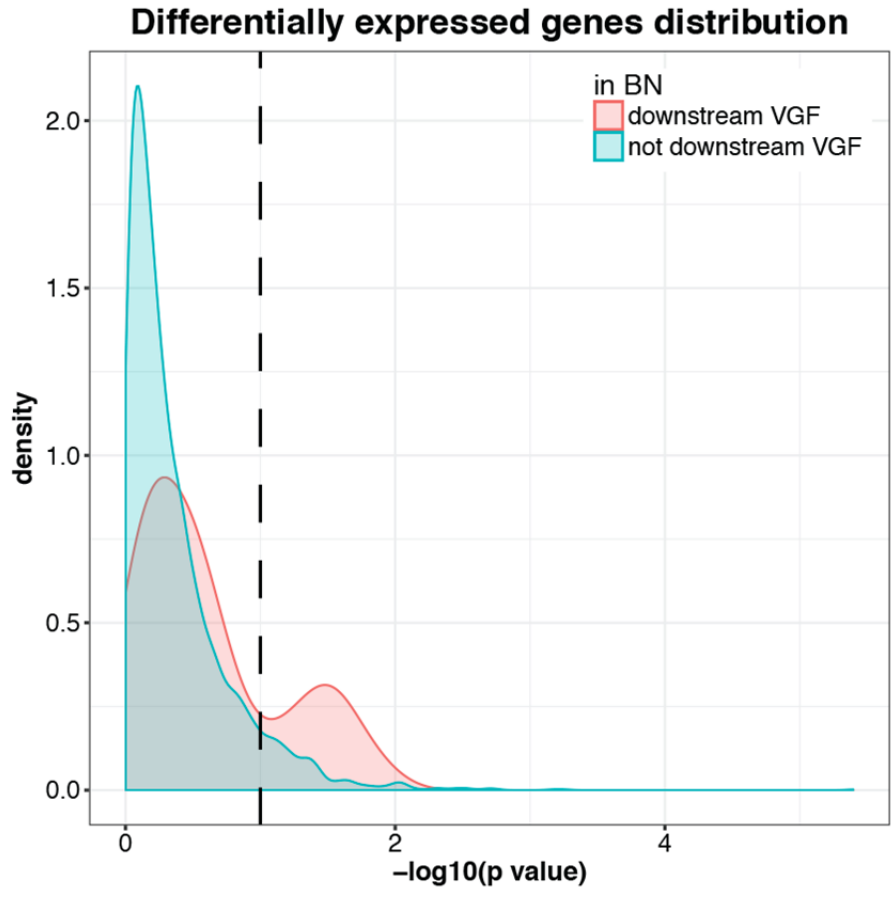

140

141 **Supplementary Fig. 8.**

142 **Molecular validation VGF with germline overexpression model.** Density plot of the  
143 distribution of differential expression nominal p-values for genes downstream and not  
144 downstream (causally independent of the expression levels) of VGF in the gene-only network for  
145 mouse DE genes (5xFAD, WT versus 5xFAD, VGF $\Delta/\Delta$  brains): The x axis is the  $-\log_{10}(\text{p-}$   
146  $\text{value})$  and the y axis the densities. The red and blue curves are for genes downstream and not  
147 downstream of VGF in the network respectively.

148

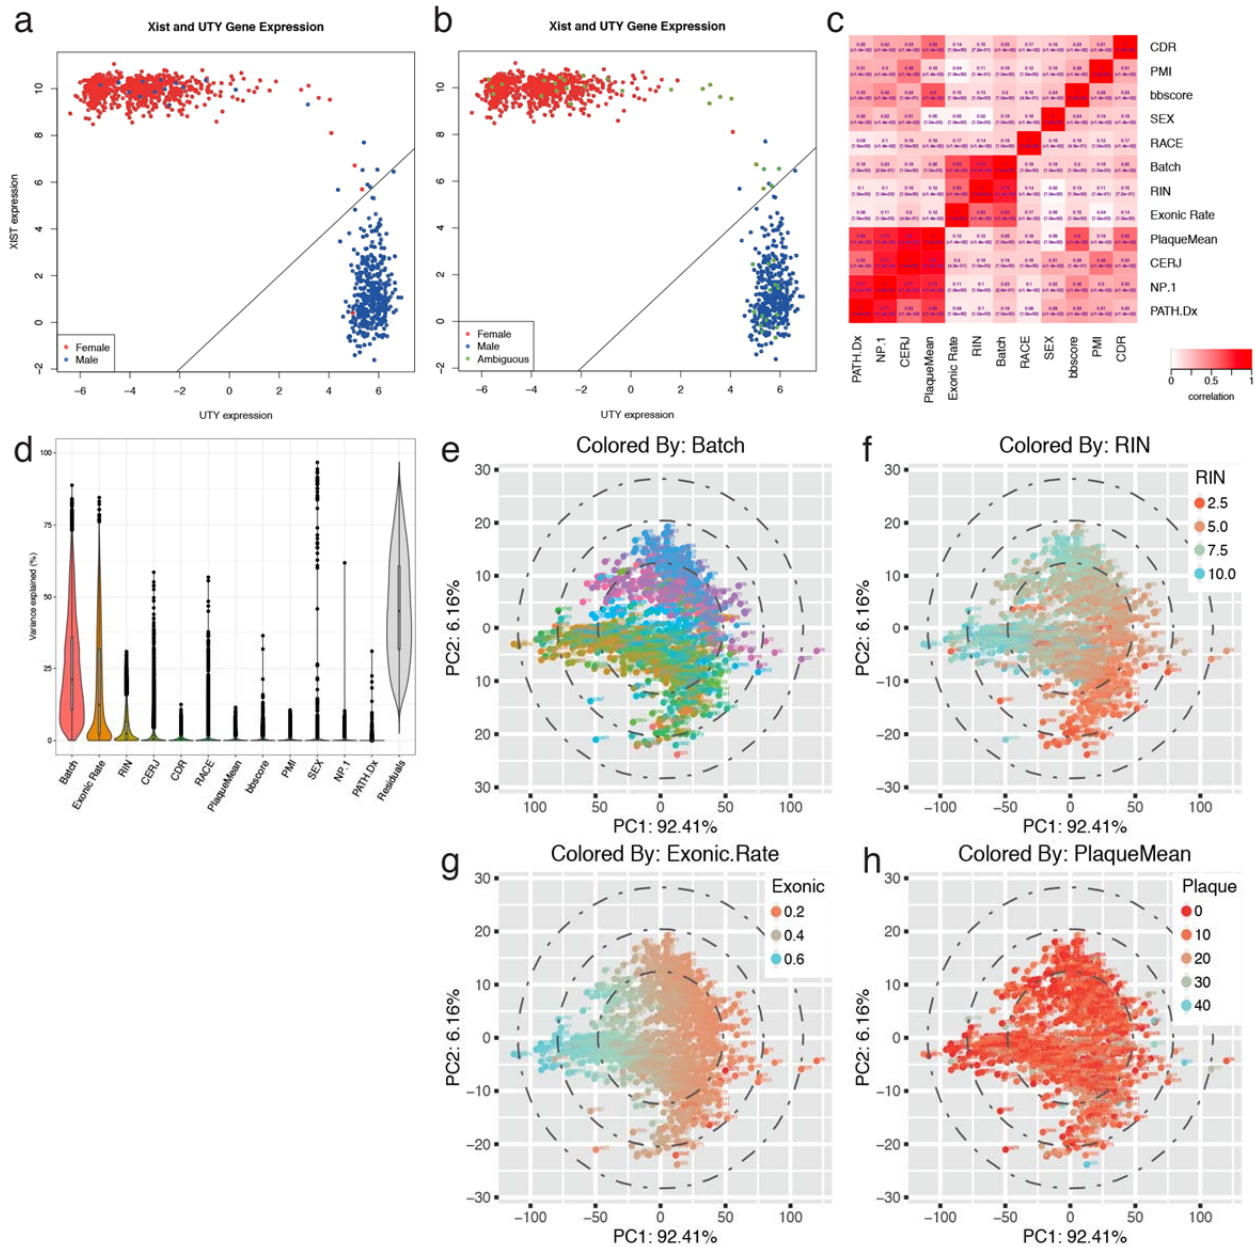

149

150 **Supplementary Fig. 9.**

151 **Data quality control. a and b** Imputed RNA-seq sex colored by sex clinical information:  
 152 Normalized gene expression for XIST (female specific gene, y axis) and UTY (ubiquitously  
 153 expressed Y-chromosome gene, male specific, x axis). **a** Obvious sex mislabeling is present in  
 154 the dataset. **b** After fixing the mislabeling, ambiguous samples (removed from further analyses)  
 155 are shown in green. **c** Canonical correlation heatmap of disease traits and covariates included in  
 156 the model. The intensity of the red color indicates the strength of the correlation between traits  
 157 and the canonical correlation (parentheses indicate Bonferroni adjusted permutation p-value) is  
 158 indicated in each box. The x and y axes represent the traits and covariates: clinical dementia  
 159 rating (CDR), post mortem interval (PMI), Braak score (bbscore), sex, race, batch, RNA  
 160 integrity number (RIN), exonic mapping rate (exonic rate), mean neocortical plaque density

161 (number of plaques/mm2, PlaqueMean), CERAD neuropath Criteria (CERJ), neuropathology  
 162 category (NP.1), clinical neuropathology (PATH.Dx). **d** Variance-partition violin plots of the  
 163 disease traits and covariates included in the model. **e, f, g and h** Principal component analyses of  
 164 important covariates: panels of this Fig. represent the same samples (one sample per point). The  
 165 x axis is PC1 and explains 92.41% of the variance in the expression data. The y axis is PC2 and  
 166 explains 6.16% of the variance in the expression data. The samples are colored by different QC  
 167 or clinical information associated to them.  
 168

## 169 Supplementary Tables

### 170 Supplementary Table 1. Full Reference List for Approaches Shown in Introduction, 171 Results, and Methods

| Section      | Approach                       | Full References                                                                                                                                                                                                                                                                                                                                                                                                                                                                                                                                                                                |
|--------------|--------------------------------|------------------------------------------------------------------------------------------------------------------------------------------------------------------------------------------------------------------------------------------------------------------------------------------------------------------------------------------------------------------------------------------------------------------------------------------------------------------------------------------------------------------------------------------------------------------------------------------------|
| Introduction | Integrative biology approaches | Modeling of correlated traits vs causally related traits <sup>5-20</sup> ; eQTL as a systematic perturbation source <sup>6,8,9,11,21-38</sup> .                                                                                                                                                                                                                                                                                                                                                                                                                                                |
| Methods      | Data Description               | Ribo-Zero <sup>39</sup> ; CDR, Path Dx, CERAD neuropath CERJ, neuropath NP-1, mean neocortical plaque density, Braak score <sup>40-45</sup> ; STAR alignment <sup>46</sup> ; featureCounts <sup>47</sup> ; GATK <sup>48</sup> ; voom and lmFit functions from limma R <sup>49-51</sup> .                                                                                                                                                                                                                                                                                                       |
|              | DE analyses                    | limma package after the adjustment for covariates <sup>51</sup> ; GOtest <sup>52</sup> ; msigdb <sup>53</sup> ; public DE sets genes <sup>11,54-61</sup> and proteins <sup>62-68</sup> ; AD GWAS <sup>69</sup> ; GWAS in TAD set <sup>70</sup> ; locus R <sup>2</sup> <sup>71,72</sup> .                                                                                                                                                                                                                                                                                                       |
|              | RNA Seq Processing             | Main drivers of variance were explored using principal component (PC) analyses and linear mixed models (variancePartition) <sup>73</sup>                                                                                                                                                                                                                                                                                                                                                                                                                                                       |
|              | QTL analyses                   | fastQTL package <sup>74</sup> ; plink2 <sup>75,76</sup> ; European individuals only used to find QTLs <sup>77</sup> ; non-European samples identified through PCA analyses using smartPCA and mapping in PC space to the 1000 Genomes Project consortium <sup>78,79</sup> ; VCF-liftover of ROSMAP WGS from hg19 to hg38 <sup>80</sup> ; PEER surrogate (latent) variable (SVs) correction <sup>81</sup> ; FDR computed following Benjamini-Hochberg procedure <sup>82</sup> .                                                                                                                 |
|              | Co-expression analyses         | coexpp R package <sup>83,84</sup>                                                                                                                                                                                                                                                                                                                                                                                                                                                                                                                                                              |
|              | Seeding gene list construction | PEXA <sup>85</sup> ; PPI network from CPDB <sup>86,87</sup> .                                                                                                                                                                                                                                                                                                                                                                                                                                                                                                                                  |
|              | Bayesian Causal Network (BN)   | RIMBANET <sup>36-38,88</sup> ; Cytoscape v3.5.1 <sup>89</sup> .                                                                                                                                                                                                                                                                                                                                                                                                                                                                                                                                |
|              | Key Driver Analyses            | R package KDA <sup>90,91</sup> ; distances function of the igraph R package <sup>92</sup>                                                                                                                                                                                                                                                                                                                                                                                                                                                                                                      |
|              | Random Forest Classifiers      | data stratified by class <sup>93</sup> ; SMOTE <sup>94,95</sup> ; python sklearn package <sup>96,97</sup> ; ROC curve quantification <sup>98</sup> ; information gain score <sup>99</sup> ; weighted z-score method <sup>100,101</sup> .                                                                                                                                                                                                                                                                                                                                                       |
|              | Polygenic risk score analyses  | WGS <sup>1</sup> ; Plink2 <sup>75,76</sup> ; I-GAP AD GWAS summary statistics <sup>102</sup> ; PRSice2 <sup>103</sup> .                                                                                                                                                                                                                                                                                                                                                                                                                                                                        |
|              | Statistical Analyses           | R v3.3.1 <sup>104</sup> ; GO annotations enrichment tested with R packages goseq <sup>105</sup> , topGO <sup>106</sup> and org.Hs.eg.db <sup>107</sup> ; MSigDB pathway enrichment tested with R packages HTSanalyzeR <sup>108</sup> , GSEABase <sup>109</sup> , and gage <sup>110</sup> ; figures generated using R packages ggplot2 <sup>111</sup> , scales <sup>112</sup> , reshape2 <sup>113</sup> ( <a href="http://www.jstatsoft.org/v21/i12/">http://www.jstatsoft.org/v21/i12/.</a> ) and grid <sup>114</sup> . UpsetR plots generated with UpSetR R package <sup>115</sup> ; heatmaps |

|         |                                              |                                                                                                                                                                                                                                                                                                                                                                                                                                                                                                                                                                                                                              |
|---------|----------------------------------------------|------------------------------------------------------------------------------------------------------------------------------------------------------------------------------------------------------------------------------------------------------------------------------------------------------------------------------------------------------------------------------------------------------------------------------------------------------------------------------------------------------------------------------------------------------------------------------------------------------------------------------|
|         |                                              | produced with function heatmap.2 of the R package gplots <sup>116</sup> ; Venn diagrams were drawn using VennDiagram R package <sup>117</sup> ; Circos (circular) plot of DE enrichments in modules plotted using NetWeaver R package <sup>118,119</sup> ; Canonical Correlation analyses performed with the canCorPairs function of the variancePartition R package <sup>73</sup> and canonical correlation p-values computed with the p.perm function of the CCP R package <sup>120</sup> with 10,000 random sampling of the labels; large tables were read-in and written using the R package data.table <sup>121</sup> . |
|         | Animal models and stereotaxic surgery        | Cannula implantation in the lateral ventricle [AP=-0.1, ML=±1.0 and DV: -3.0 from bregma (mm)] <sup>122</sup>                                                                                                                                                                                                                                                                                                                                                                                                                                                                                                                |
|         | Immunohistochemical and biochemical analyses | Immunohistochemical and biochemical characterization <sup>123-127</sup>                                                                                                                                                                                                                                                                                                                                                                                                                                                                                                                                                      |
|         | Behavioral testing and analysis              | Barnes Maze test was performed using a standard apparatus <sup>128,129</sup>                                                                                                                                                                                                                                                                                                                                                                                                                                                                                                                                                 |
|         | Field electrophysiology                      | Coronal brain slices containing the hippocampal formation were prepared as previously described <sup>130</sup>                                                                                                                                                                                                                                                                                                                                                                                                                                                                                                               |
| Results | Causal network relationships                 | RIMBANET <sup>6-8,11,22,23,31,33,36,38,88,131</sup> , structure priors <sup>6,8,11-20,29,31,36-38,88</sup> , power boosting to infer causal relationships <sup>6,8,11,29,31,36-38,88</sup> , QTL perturbation to enhance causal inference among molecular traits across a broad range of diseases and data types <sup>6-8,11,21,23,25,28,29,31,32,34,35,37,38,88,132-139</sup> .                                                                                                                                                                                                                                             |
|         | DE sets                                      | Study-specific sets of DE for significantly up- and down-regulated genes <sup>11,54-61</sup> and proteins <sup>62-68</sup>                                                                                                                                                                                                                                                                                                                                                                                                                                                                                                   |
|         | Bayesian network (BN)                        | Use of BNs to capture linear and higher order correlations, nonlinear relationships, and infer causal links <sup>8,11,14,17,22,29,36,38,88,140,141</sup> .                                                                                                                                                                                                                                                                                                                                                                                                                                                                   |
|         | Molecular Validation                         | Gene expression signatures induced by perturbing KDs can be compared to network predicted changes <sup>8,11,22,28,29,31</sup>                                                                                                                                                                                                                                                                                                                                                                                                                                                                                                |

172

173

174 **Supplementary Table 2.**

175 **Classification of AD.** This table defines the thresholds of each disease trait for the classification  
 176 of samples in disease categories <sup>118,142</sup> (for ROSMAP details, see  
 177 <https://www.synapse.org/#!Synapse:syn3191090>). A full list of samples per disease trait and  
 178 category can be found in Supplementary Data 1.

| Dataset | classifier | controls   | AD           | definite controls | definite AD (dAD) |
|---------|------------|------------|--------------|-------------------|-------------------|
| MSBB    | PlaqueMean | continuous | continuous   | < 6               | >= 12             |
| MSBB    | CDR        | < 1        | >= 1         | 0                 | >= 1              |
| MSBB    | CERJ       | < 2        | >= 2         | 1                 | 2                 |
| MSBB    | Path DX    | controls   | non-controls | controls          | dAD               |
| MSBB    | bbscore    | < 3        | >= 3         | < 3               | >= 3              |
| MSBB    | NP-1       | < 2        | >= 2         | 1                 | 2                 |
| ROSMAP  | Braaksc    | < 3        | >= 3         | < 3               | >= 3              |
| ROSMAP  | Ceradsc    | >= 4       | < 4          | 4                 | 1                 |
| ROSMAP  | Cogdx      | < 4        | >= 4         | 1                 | [4, 5]            |

179

180

181

182

183  
184

**Supplementary Table 3. Network Proteins and their Potential Roles in Alzheimer's Disease**

| <b>Protein</b> | <b>Roles in AD and References</b>                                                                                                                                                                                                                                                                                                                                                                                                                                                                                                                                                                                                                                |
|----------------|------------------------------------------------------------------------------------------------------------------------------------------------------------------------------------------------------------------------------------------------------------------------------------------------------------------------------------------------------------------------------------------------------------------------------------------------------------------------------------------------------------------------------------------------------------------------------------------------------------------------------------------------------------------|
| ANK2           | PIK3C3-ankyrin-B-dynactin pathway promotes axonal growth and multiorganelle transport <sup>143</sup>                                                                                                                                                                                                                                                                                                                                                                                                                                                                                                                                                             |
| GFAP           | Neuronal expression of GFAP in patients with Alzheimer pathology and identification of novel GFAP splice forms <sup>69</sup>                                                                                                                                                                                                                                                                                                                                                                                                                                                                                                                                     |
| GSN            | Plasma gelsolin and matrix metalloproteinase 3 are potential biomarkers for Alzheimer disease <sup>107</sup>                                                                                                                                                                                                                                                                                                                                                                                                                                                                                                                                                     |
| HOPX           | Modulates hippocampal neurogenesis <sup>144</sup>                                                                                                                                                                                                                                                                                                                                                                                                                                                                                                                                                                                                                |
| HSPB1          | Modulates amyloid-beta protein precursor expression <sup>67</sup>                                                                                                                                                                                                                                                                                                                                                                                                                                                                                                                                                                                                |
| HSPB6          | Neuroprotective and increases dendritic complexity <sup>145,146</sup>                                                                                                                                                                                                                                                                                                                                                                                                                                                                                                                                                                                            |
| MAOB           | Monoamine oxidase-B inhibition in Alzheimer's disease <sup>108</sup>                                                                                                                                                                                                                                                                                                                                                                                                                                                                                                                                                                                             |
| PAD12          | Abnormal accumulation of citrullinated proteins catalyzed by peptidylarginine deiminase in hippocampal extracts from patients with Alzheimer's disease <sup>147,148</sup>                                                                                                                                                                                                                                                                                                                                                                                                                                                                                        |
| PLXNB1         | Semaphorin 4D-plexin-B signalling complex regulates dendritic and axonal complexity <sup>149,150</sup>                                                                                                                                                                                                                                                                                                                                                                                                                                                                                                                                                           |
| RPH3A          | Decreased rabphilin 3A immunoreactivity in Alzheimer's disease is associated with Abeta burden <sup>71</sup> ; involved in trafficking and release of neuronal synaptic or dense core vesicles <sup>151,152</sup>                                                                                                                                                                                                                                                                                                                                                                                                                                                |
| SCG2           | Critical for DCV biogenesis and the regulated secretion of neurotrophins, neuropeptides, and/or catecholamines <sup>153</sup> ; required for neuronal differentiation and neural progenitor maturation <sup>154</sup> ; reduced levels in Alzheimer's disease patient temporal cortex <sup>91</sup>                                                                                                                                                                                                                                                                                                                                                              |
| STXBP5L        | STXBP5L (Tomosyn) involved in trafficking and release of neuronal synaptic or dense core vesicles <sup>151,152</sup>                                                                                                                                                                                                                                                                                                                                                                                                                                                                                                                                             |
| SYT1           | Synaptotagmins interact with APP and promote amyloid-beta generation <sup>155</sup>                                                                                                                                                                                                                                                                                                                                                                                                                                                                                                                                                                              |
| TAGLN3         | Neuronal protein 22/25 (TAGLN3) interacts with F-actin <sup>156,157</sup>                                                                                                                                                                                                                                                                                                                                                                                                                                                                                                                                                                                        |
| VGF            | Interacts with amyloid precursor-like protein 1 (APLP1) <sup>158</sup> ; critical for DCV biogenesis and the regulated secretion of neurotrophins, neuropeptides, and/or catecholamines <sup>153</sup> ; VGF levels in CSF are reduced prospectively in patients with mild cognitive impairment, selectively in those who develop AD <sup>159,160</sup> and in AD <sup>159,161-164</sup> <sup>159,165</sup> ; VGF levels in plasma are reduced in Parkinson's disease <sup>166</sup> amyotrophic lateral sclerosis (ALS) <sup>167</sup> , and major depressive disorder (MDD) <sup>168</sup> , and are regulated by obesity and type 2 diabetes <sup>169</sup> . |

185  
186

**Supplementary Table 4. Network Genes and their Potential Roles in Alzheimer's Disease**

| Gene                              | Regulation              | Roles in AD and Full References                                                                                                                                                                                                                                                                                                                                                                                 |
|-----------------------------------|-------------------------|-----------------------------------------------------------------------------------------------------------------------------------------------------------------------------------------------------------------------------------------------------------------------------------------------------------------------------------------------------------------------------------------------------------------|
| <i>BDNF</i>                       | CRE/CREB <sup>170</sup> | Neuroprotective effects against A $\beta$ insults <sup>170</sup> ; BDNF plus increased adult hippocampal neurogenesis and exercise improves cognition in 5xFAD <sup>171</sup> ; BDNF Val66Met SNP modulates neuropathology and cognitive decline in subjects with AD <sup>172</sup> ; BDNF/TrkB signaling plays a critical role in memory and Alzheimer's disease <sup>173</sup>                                |
| <i>CLU</i>                        |                         | Genome-wide association study identifies variants at <i>CLU</i> and <i>PICALM</i> associated with Alzheimer's disease <sup>174</sup>                                                                                                                                                                                                                                                                            |
| <i>CRH</i>                        | CRE/CREB <sup>170</sup> | Neuroprotective effects against A $\beta$ insults <sup>171</sup>                                                                                                                                                                                                                                                                                                                                                |
| <i>DUSP4</i>                      | CRE/CREB <sup>170</sup> | <i>DUSP4</i> knockout mice have spatial reference and working memory deficits <sup>175</sup>                                                                                                                                                                                                                                                                                                                    |
| <i>DUSP6</i>                      |                         | <i>DUSP6</i> is expressed in microglia and is regulated by BDNF gene ablation in PFC <sup>176,177</sup> ; <i>DUSP6</i> levels reduced in brains of Alzheimer's Disease patients <sup>178</sup>                                                                                                                                                                                                                  |
| <i>FOSB</i>                       | CRE/CREB <sup>170</sup> | DeltaFosB regulates gene expression and cognitive dysfunction in a mouse model of Alzheimer's disease <sup>179</sup>                                                                                                                                                                                                                                                                                            |
| <i>GNG4</i>                       |                         | Implicated in cognitive decline during aging <sup>180</sup> and downregulated in aged 5xFAD mice compared to age-matched WT <sup>181</sup>                                                                                                                                                                                                                                                                      |
| <i>GRASP</i>                      |                         | <i>GRASP</i> (tamalin) is a scaffold protein that interacts with metabotropic glutamate receptors and regulates synaptic function <sup>182</sup>                                                                                                                                                                                                                                                                |
| <i>MSK1</i><br>( <i>RPS6KA5</i> ) |                         | Mitogen- and stress-activated kinase ( <i>MSK1</i> or <i>RPS6KA5</i> ) regulates BDNF signaling to CREB <sup>183</sup> , hippocampal neurogenesis <sup>184</sup> , synaptic plasticity <sup>185</sup> , and cognition <sup>186</sup>                                                                                                                                                                            |
| <i>NPTX2</i><br>( <i>NARP</i> )   | CRE/CREB <sup>170</sup> | Reduced CSF and cerebral cortical <i>NPTX2</i> correlated with cognitive dysfunction in Alzheimer's Disease <sup>187</sup>                                                                                                                                                                                                                                                                                      |
| <i>PTK2B</i><br>( <i>PYK2</i> )   |                         | <i>Pyk2</i> overexpression in 5xFAD Hc improves synaptic markers and behavioral performance <sup>188</sup> ; <i>Pyk2</i> mediates amyloid- $\beta$ -induced synaptic dysfunction and loss <sup>189</sup> ; <i>Pyk2</i> is a novel tau tyrosine kinase <sup>190</sup> ; in a functional screen of Alzheimer risk loci, <i>PTK2B</i> acts as an early marker and in vivo modulator of Tau toxicity <sup>191</sup> |
| <i>RPH3A</i>                      |                         | Decreased rabphilin 3A immunoreactivity in Alzheimer's disease is associated with A $\beta$ burden <sup>71</sup>                                                                                                                                                                                                                                                                                                |
| <i>SCG2</i>                       | CRE/CREB <sup>170</sup> | Critical for DCV biogenesis and the regulated secretion of neurotrophins, neuropeptides, and/or catecholamines <sup>153</sup> ; required for neuronal differentiation and neural progenitor maturation <sup>154</sup> ; reduced levels in Alzheimer's disease patient temporal cortex <sup>91</sup>                                                                                                             |
| <i>SST</i>                        | CRE/CREB <sup>170</sup> | Somatostatin-like immunoreactivity reduced in cerebral cortex from Alzheimer's disease patients <sup>192</sup>                                                                                                                                                                                                                                                                                                  |
| <i>TAC1</i>                       | CRE/CREB <sup>170</sup> | Encoding pre-protachykinin 1 peptide precursor with gene expression reduced in AD brain <sup>193</sup>                                                                                                                                                                                                                                                                                                          |
| <i>VGF</i>                        | CRE/CREB <sup>170</sup> | Critical for DCV biogenesis and the regulated secretion of neurotrophins, neuropeptides, and/or catecholamines <sup>153</sup> ; interacts with amyloid precursor-like protein 1 ( <i>APLP1</i> ) <sup>158</sup>                                                                                                                                                                                                 |

188

189

190

191



193 **Supplementary References**

- 194 1. Wang M, Beckmann ND, Roussos P, et al. The Mount Sinai cohort of large-scale genomic,  
195 transcriptomic and proteomic data in Alzheimer's disease. *Sci Data*. 2018;5:180185.
- 196 2. An JJ, Gharami K, Liao GY, et al. Distinct role of long 3' UTR BDNF mRNA in spine  
197 morphology and synaptic plasticity in hippocampal neurons. *Cell*. 2008;134(1):175-187.
- 198 3. Cajigas IJ, Tushev G, Will TJ, tom Dieck S, Fuerst N, Schuman EM. The local  
199 transcriptome in the synaptic neuropil revealed by deep sequencing and high-resolution  
200 imaging. *Neuron*. 2012;74(3):453-466.
- 201 4. Orefice LL, Waterhouse EG, Partridge JG, Lalchandani RR, Vicini S, Xu B. Distinct  
202 roles for somatically and dendritically synthesized brain-derived neurotrophic factor in  
203 morphogenesis of dendritic spines. *J Neurosci*. 2013;33(28):11618-11632.
- 204 5. Califano A, Butte AJ, Friend S, Ideker T, Schadt E. Leveraging models of cell regulation  
205 and GWAS data in integrative network-based association studies. *Nat Genet*.  
206 2012;44(8):841-847.
- 207 6. Franzen O, Ermel R, Cohain A, et al. Cardiometabolic risk loci share downstream cis-  
208 and trans-gene regulation across tissues and diseases. *Science*. 2016;353(6301):827-830.
- 209 7. Miller CL, Pjanic M, Wang T, et al. Integrative functional genomics identifies regulatory  
210 mechanisms at coronary artery disease loci. *Nat Commun*. 2016;7:12092.
- 211 8. Peters LA, Perrigoue J, Mortha A, et al. A functional genomics predictive network model  
212 identifies regulators of inflammatory bowel disease. *Nat Genet*. 2017;49(10):1437-1449.
- 213 9. Readhead B, Haure-Mirande JV, Funk CC, et al. Multiscale Analysis of Independent  
214 Alzheimer's Cohorts Finds Disruption of Molecular, Genetic, and Clinical Networks by  
215 Human Herpesvirus. *Neuron*. 2018;99(1):64-82 e67.
- 216 10. Schadt EE. Molecular networks as sensors and drivers of common human diseases.  
217 *Nature*. 2009;461(7261):218-223.
- 218 11. Zhang B, Gaiteri C, Bodea LG, et al. Integrated systems approach identifies genetic  
219 nodes and networks in late-onset Alzheimer's disease. *Cell*. 2013;153(3):707-720.
- 220 12. Chen JC, Alvarez MJ, Talos F, et al. Identification of causal genetic drivers of human  
221 disease through systems-level analysis of regulatory networks. *Cell*. 2014;159(2):402-  
222 414.
- 223 13. Huang JK, Carlin DE, Yu MK, et al. Systematic Evaluation of Molecular Networks for  
224 Discovery of Disease Genes. *Cell Syst*. 2018;6(4):484-495 e485.
- 225 14. Meng Q, Wang K, Brunetti T, et al. The DGCR5 long noncoding RNA may regulate  
226 expression of several schizophrenia-related genes. *Sci Transl Med*. 2018;10(472).
- 227 15. Pokrovskii M, Hall JA, Ochayon DE, et al. Characterization of Transcriptional  
228 Regulatory Networks that Promote and Restrict Identities and Functions of Intestinal  
229 Innate Lymphoid Cells. *Immunity*. 2019;51(1):185-197 e186.
- 230 16. Repunte-Canonigo V, Shin W, Vendruscolo LF, et al. Identifying candidate drivers of  
231 alcohol dependence-induced excessive drinking by assembly and interrogation of brain-  
232 specific regulatory networks. *Genome Biol*. 2015;16:68.
- 233 17. Scarpa JR, Jiang P, Gao VD, et al. Cross-species systems analysis identifies gene  
234 networks differentially altered by sleep loss and depression. *Sci Adv*. 2018;4(7):eaat1294.
- 235 18. Shu L, Blencowe M, Yang X. Translating GWAS Findings to Novel Therapeutic Targets  
236 for Coronary Artery Disease. *Front Cardiovasc Med*. 2018;5:56.

- 237 19. Tomljanovic Z, Patel M, Shin W, Califano A, Teich AF. ZCCHC17 is a master regulator  
238 of synaptic gene expression in Alzheimer's disease. *Bioinformatics*. 2018;34(3):367-371.
- 239 20. Walsh LA, Alvarez MJ, Sabio EY, et al. An Integrated Systems Biology Approach  
240 Identifies TRIM25 as a Key Determinant of Breast Cancer Metastasis. *Cell Rep*.  
241 2017;20(7):1623-1640.
- 242 21. Chang R, Karr JR, Schadt EE. Causal inference in biology networks with integrated  
243 belief propagation. *Pac Symp Biocomput*. 2015:359-370.
- 244 22. Chen Y, Zhu J, Lum PY, et al. Variations in DNA elucidate molecular networks that  
245 cause disease. *Nature*. 2008;452(7186):429-435.
- 246 23. Emilsson V, Thorleifsson G, Zhang B, et al. Genetics of gene expression and its effect on  
247 disease. *Nature*. 2008;452(7186):423-428.
- 248 24. Fromer M, Roussos P, Sieberts SK, et al. Gene expression elucidates functional impact of  
249 polygenic risk for schizophrenia. *Nat Neurosci*. 2016;19(11):1442-1453.
- 250 25. Ghazalpour A, Doss S, Zhang B, et al. Integrating genetic and network analysis to  
251 characterize genes related to mouse weight. *PLoS Genet*. 2006;2(8):e130.
- 252 26. Greenawalt DM, Dobrin R, Chudin E, et al. A survey of the genetics of stomach, liver,  
253 and adipose gene expression from a morbidly obese cohort. *Genome Res*.  
254 2011;21(7):1008-1016.
- 255 27. Grundberg E, Small KS, Hedman AK, et al. Mapping cis- and trans-regulatory effects  
256 across multiple tissues in twins. *Nat Genet*. 2012;44(10):1084-1089.
- 257 28. Mehrabian M, Allayee H, Stockton J, et al. Integrating genotypic and expression data in a  
258 segregating mouse population to identify 5-lipoxygenase as a susceptibility gene for  
259 obesity and bone traits. *Nat Genet*. 2005;37(11):1224-1233.
- 260 29. Schadt EE, Lamb J, Yang X, et al. An integrative genomics approach to infer causal  
261 associations between gene expression and disease. *Nat Genet*. 2005;37(7):710-717.
- 262 30. Wang S, Yehya N, Schadt EE, Wang H, Drake TA, Lusk AJ. Genetic and genomic  
263 analysis of a fat mass trait with complex inheritance reveals marked sex specificity. *PLoS*  
264 *Genet*. 2006;2(2):e15.
- 265 31. Yang X, Deignan JL, Qi H, et al. Validation of candidate causal genes for obesity that  
266 affect shared metabolic pathways and networks. *Nat Genet*. 2009;41(4):415-423.
- 267 32. Yang X, Schadt EE, Wang S, et al. Tissue-specific expression and regulation of sexually  
268 dimorphic genes in mice. *Genome Res*. 2006;16(8):995-1004.
- 269 33. Yoo S, Takikawa S, Geraghty P, et al. Integrative analysis of DNA methylation and gene  
270 expression data identifies EPAS1 as a key regulator of COPD. *PLoS Genet*.  
271 2015;11(1):e1004898.
- 272 34. Zhong H, Beaulaurier J, Lum PY, et al. Liver and adipose expression associated SNPs are  
273 enriched for association to type 2 diabetes. *PLoS Genet*. 2010;6(5):e1000932.
- 274 35. Zhong H, Yang X, Kaplan LM, Molony C, Schadt EE. Integrating pathway analysis and  
275 genetics of gene expression for genome-wide association studies. *Am J Hum Genet*.  
276 2010;86(4):581-591.
- 277 36. Zhu J, Sova P, Xu Q, et al. Stitching together multiple data dimensions reveals interacting  
278 metabolomic and transcriptomic networks that modulate cell regulation. *PLoS Biol*.  
279 2012;10(4):e1001301.
- 280 37. Zhu J, Wiener MC, Zhang C, et al. Increasing the power to detect causal associations by  
281 combining genotypic and expression data in segregating populations. *PLoS Comput Biol*.  
282 2007;3(4):e69.

- 283 38. Zhu J, Zhang B, Smith EN, et al. Integrating large-scale functional genomic data to  
284 dissect the complexity of yeast regulatory networks. *Nat Genet.* 2008;40(7):854-861.
- 285 39. Sultan M, Amstislavskiy V, Risch T, et al. Influence of RNA extraction methods and  
286 library selection schemes on RNA-seq data. *BMC Genomics.* 2014;15:675.
- 287 40. Burke WJ, Miller JP, Rubin EH, et al. Reliability of the Washington University Clinical  
288 Dementia Rating. *Arch Neurol.* 1988;45(1):31-32.
- 289 41. Murayama S, Saito Y. Neuropathological diagnostic criteria for Alzheimer's disease.  
290 *Neuropathology.* 2004;24(3):254-260.
- 291 42. Braak H, Braak E. Neuropathological staging of Alzheimer-related changes. *Acta*  
292 *Neuropathol.* 1991;82(4):239-259.
- 293 43. Hardy J, Selkoe DJ. The amyloid hypothesis of Alzheimer's disease: progress and  
294 problems on the road to therapeutics. *Science.* 2002;297(5580):353-356.
- 295 44. Hyman BT, Phelps CH, Beach TG, et al. National Institute on Aging-Alzheimer's  
296 Association guidelines for the neuropathologic assessment of Alzheimer's disease.  
297 *Alzheimers Dement.* 2012;8(1):1-13.
- 298 45. Hyman BT, Trojanowski JQ. Consensus recommendations for the postmortem diagnosis  
299 of Alzheimer disease from the National Institute on Aging and the Reagan Institute  
300 Working Group on diagnostic criteria for the neuropathological assessment of Alzheimer  
301 disease. *J Neuropathol Exp Neurol.* 1997;56(10):1095-1097.
- 302 46. Dobin A, Davis CA, Schlesinger F, et al. STAR: ultrafast universal RNA-seq aligner.  
303 *Bioinformatics.* 2013;29(1):15-21.
- 304 47. Liao Y, Smyth GK, Shi W. featureCounts: an efficient general purpose program for  
305 assigning sequence reads to genomic features. *Bioinformatics.* 2014;30(7):923-930.
- 306 48. Van der Auwera GA, Carneiro MO, Hartl C, et al. From FastQ data to high confidence  
307 variant calls: the Genome Analysis Toolkit best practices pipeline. *Curr Protoc*  
308 *Bioinformatics.* 2013;43:11 10 11-33.
- 309 49. Robinson MD, Oshlack A. A scaling normalization method for differential expression  
310 analysis of RNA-seq data. *Genome Biol.* 2010;11(3):R25.
- 311 50. Robinson MD, McCarthy DJ, Smyth GK. edgeR: a Bioconductor package for differential  
312 expression analysis of digital gene expression data. *Bioinformatics.* 2010;26(1):139-140.
- 313 51. Ritchie ME, Phipson B, Wu D, et al. limma powers differential expression analyses for  
314 RNA-sequencing and microarray studies. *Nucleic Acids Res.* 2015;43(7):e47.
- 315 52. *GOTest: Gene Ontology and Set Enrichment Test* [computer program]. Version  
316 1.0.62019.
- 317 53. *msigdb: MSigDB Gene Set Collections* [computer program]. Version 0.1.42017.
- 318 54. Allen M, Wang X, Burgess JD, et al. Conserved brain myelination networks are altered in  
319 Alzheimer's and other neurodegenerative diseases. *Alzheimers Dement.* 2018;14(3):352-  
320 366.
- 321 55. Avramopoulos D, Szymanski M, Wang R, Bassett S. Gene expression reveals overlap  
322 between normal aging and Alzheimer's disease genes. *Neurobiol Aging.*  
323 2011;32(12):2319 e2327-2334.
- 324 56. Blalock EM, Geddes JW, Chen KC, Porter NM, Markesbery WR, Landfield PW.  
325 Incipient Alzheimer's disease: microarray correlation analyses reveal major  
326 transcriptional and tumor suppressor responses. *Proc Natl Acad Sci U S A.*  
327 2004;101(7):2173-2178.

- 328 57. Colangelo V, Schurr J, Ball MJ, Pelaez RP, Bazan NG, Lukiw WJ. Gene expression  
329 profiling of 12633 genes in Alzheimer hippocampal CA1: transcription and neurotrophic  
330 factor down-regulation and up-regulation of apoptotic and pro-inflammatory signaling. *J*  
331 *Neurosci Res.* 2002;70(3):462-473.
- 332 58. Liang WS, Dunkley T, Beach TG, et al. Altered neuronal gene expression in brain  
333 regions differentially affected by Alzheimer's disease: a reference data set. *Physiol*  
334 *Genomics.* 2008;33(2):240-256.
- 335 59. Miller JA, Woltjer RL, Goodenbour JM, Horvath S, Geschwind DH. Genes and pathways  
336 underlying regional and cell type changes in Alzheimer's disease. *Genome Med.*  
337 2013;5(5):48.
- 338 60. Mostafavi S, Gaiteri C, Sullivan SE, et al. A molecular network of the aging human brain  
339 provides insights into the pathology and cognitive decline of Alzheimer's disease. *Nat*  
340 *Neurosci.* 2018;21(6):811-819.
- 341 61. Satoh J, Yamamoto Y, Asahina N, Kitano S, Kino Y. RNA-Seq data mining:  
342 downregulation of NeuroD6 serves as a possible biomarker for alzheimer's disease  
343 brains. *Dis Markers.* 2014;2014:123165.
- 344 62. Dai J, Johnson ECB, Dammer EB, et al. Effects of APOE Genotype on Brain Proteomic  
345 Network and Cell Type Changes in Alzheimer's Disease. *Front Mol Neurosci.*  
346 2018;11:454.
- 347 63. Hondius DC, van Nierop P, Li KW, et al. Profiling the human hippocampal proteome at  
348 all pathologic stages of Alzheimer's disease. *Alzheimers Dement.* 2016;12(6):654-668.
- 349 64. Johnson ECB, Dammer EB, Duong DM, et al. Deep proteomic network analysis of  
350 Alzheimer's disease brain reveals alterations in RNA binding proteins and RNA splicing  
351 associated with disease. *Mol Neurodegener.* 2018;13(1):52.
- 352 65. Mendonca CF, Kuras M, Nogueira FCS, et al. Proteomic signatures of brain regions  
353 affected by tau pathology in early and late stages of Alzheimer's disease. *Neurobiol Dis.*  
354 2019;130:104509.
- 355 66. Seyfried NT, Dammer EB, Swarup V, et al. A Multi-network Approach Identifies  
356 Protein-Specific Co-expression in Asymptomatic and Symptomatic Alzheimer's Disease.  
357 *Cell Syst.* 2017;4(1):60-72 e64.
- 358 67. Wingo AP, Dammer EB, Breen MS, et al. Large-scale proteomic analysis of human brain  
359 identifies proteins associated with cognitive trajectory in advanced age. *Nat Commun.*  
360 2019;10(1):1619.
- 361 68. Zhang Q, Ma C, Gearing M, Wang PG, Chin LS, Li L. Integrated proteomics and  
362 network analysis identifies protein hubs and network alterations in Alzheimer's disease.  
363 *Acta Neuropathol Commun.* 2018;6(1):19.
- 364 69. Kunkle BW, Grenier-Boley B, Sims R, et al. Genetic meta-analysis of diagnosed  
365 Alzheimer's disease identifies new risk loci and implicates Abeta, tau, immunity and lipid  
366 processing. *Nat Genet.* 2019;51(3):414-430.
- 367 70. Wang D, Liu S, Warrell J, et al. Comprehensive functional genomic resource and  
368 integrative model for the human brain. *Science.* 2018;362(6420).
- 369 71. Machiela MJ, Chanock SJ. LDlink: a web-based application for exploring population-  
370 specific haplotype structure and linking correlated alleles of possible functional variants.  
371 *Bioinformatics.* 2015;31(21):3555-3557.

- 372 72. Machiela MJ, Chanock SJ. LDassoc: an online tool for interactively exploring genome-  
373 wide association study results and prioritizing variants for functional investigation.  
374 *Bioinformatics*. 2018;34(5):887-889.
- 375 73. Hoffman GE, Schadt EE. variancePartition: interpreting drivers of variation in complex  
376 gene expression studies. *BMC Bioinformatics*. 2016;17(1):483.
- 377 74. Ongen H, Buil A, Brown AA, Dermitzakis ET, Delaneau O. Fast and efficient QTL  
378 mapper for thousands of molecular phenotypes. *Bioinformatics*. 2016;32(10):1479-1485.
- 379 75. Chang CC, Chow CC, Tellier LC, Vattikuti S, Purcell SM, Lee JJ. Second-generation  
380 PLINK: rising to the challenge of larger and richer datasets. *Gigascience*. 2015;4:7.
- 381 76. *PLINK 1.9* [computer program].
- 382 77. Price AL, Zaitlen NA, Reich D, Patterson N. New approaches to population stratification  
383 in genome-wide association studies. *Nature reviews Genetics*. 2010;11(7):459-463.
- 384 78. Patterson N, Price AL, Reich D. Population structure and eigenanalysis. *PLoS Genet*.  
385 2006;2(12):e190.
- 386 79. The 1000 Genomes Project Consortium. A global reference for human genetic variation.  
387 *Nature*. 2015;526(7571):68-74.
- 388 80. Gilly A. VCF-liftover. 2016; <https://github.com/wtsi-team144/VCF-liftover>.
- 389 81. Stegle O, Parts L, Durbin R, Winn J. A Bayesian framework to account for complex non-  
390 genetic factors in gene expression levels greatly increases power in eQTL studies. *PLoS*  
391 *Comput Biol*. 2010;6(5):e1000770.
- 392 82. Benjamini Y, Hochberg, Y. Controlling the False Discovery Rate: A Practical and  
393 Powerful Approach to Multiple Testing. . *Journal of the Royal Statistical Society*.  
394 1995;Series B (Methodological). .
- 395 83. Langfelder P, Horvath S. WGCNA: an R package for weighted correlation network  
396 analysis. *BMC Bioinformatics*. 2008;9:559.
- 397 84. *coexp* [computer program]. 2011.
- 398 85. Tu Z, Argmann C, Wong KK, et al. Integrating siRNA and protein-protein interaction  
399 data to identify an expanded insulin signaling network. *Genome Res*. 2009;19(6):1057-  
400 1067.
- 401 86. Kanehisa M, Goto S. KEGG: kyoto encyclopedia of genes and genomes. *Nucleic Acids*  
402 *Res*. 2000;28(1):27-30.
- 403 87. Kamburov A, Stelzl U, Lehrach H, Herwig R. The ConsensusPathDB interaction  
404 database: 2013 update. *Nucleic Acids Res*. 2013;41(Database issue):D793-800.
- 405 88. Zhu J, Lum PY, Lamb J, et al. An integrative genomics approach to the reconstruction of  
406 gene networks in segregating populations. *Cytogenet Genome Res*. 2004;105(2-4):363-  
407 374.
- 408 89. Shannon P, Markiel A, Ozier O, et al. Cytoscape: a software environment for integrated  
409 models of biomolecular interaction networks. *Genome Res*. 2003;13(11):2498-2504.
- 410 90. Zhang B, Zhu J. Identification of Key Causal Regulators in Gene Networks. *Proceedings*  
411 *of the World Congress on Engineering & Computer Science*. 2013;2.
- 412 91. Lassmann H, Weiler R, Fischer P, et al. Synaptic pathology in Alzheimer's disease:  
413 immunological data for markers of synaptic and large dense-core vesicles. *Neuroscience*.  
414 1992;46(1):1-8.
- 415 92. Csardi G, Nepusz T. The igraph software package for complex network research.  
416 *InterJournal*. 2006;Complex Systems:1695.

- 417 93. James G, Witten D, Hastie T, Tibshirani R. An Introduction to Statistical Learning with  
418 Applications in R Introduction. *Springer Texts Stat.* 2013;103:1-14.
- 419 94. Chawla NV, Bowyer KW, Hall LO, Kegelmeyer WP. SMOTE: Synthetic minority over-  
420 sampling technique. *J Artif Intell Res.* 2002;16:321-357.
- 421 95. Lemaitre G, Nogueira F, Aridas CK. Imbalanced-learn: A Python Toolbox to Tackle the  
422 Curse of Imbalanced Datasets in Machine Learning. *J Mach Learn Res.* 2017;18.
- 423 96. Breiman L. Random forests. *Mach Learn.* 2001;45(1):5-32.
- 424 97. Pedregosa F, Varoquaux G, Gramfort A, et al. Scikit-learn: Machine Learning in Python.  
425 *J Mach Learn Res.* 2011;12:2825-2830.
- 426 98. Bradley AP. The use of the area under the roc curve in the evaluation of machine learning  
427 algorithms. *Pattern Recogn.* 1997;30(7):1145-1159.
- 428 99. Kullback S, Leibler RA. On Information and Sufficiency. *Ann Math Stat.* 1951;22(1):79-  
429 86.
- 430 100. Stouffer SA. *The American soldier.* Princeton,: Princeton University Press; 1949.
- 431 101. T. L. On the combination of independent tests. *Magyar Tud Akad Mat Kutato Int Kozl.*  
432 1958;3:171.
- 433 102. Lambert JC, Ibrahim-Verbaas CA, Harold D, et al. Meta-analysis of 74,046 individuals  
434 identifies 11 new susceptibility loci for Alzheimer's disease. *Nat Genet.*  
435 2013;45(12):1452-1458.
- 436 103. Euesden J, Lewis CM, O'Reilly PF. PRSice: Polygenic Risk Score software.  
437 *Bioinformatics.* 2015;31(9):1466-1468.
- 438 104. *R: A language and environment for statistical computing* [computer program]. Version  
439 3.3.1: R Foundation for Statistical Computing; 2016.
- 440 105. Young MD, Wakefield MJ, Smyth GK, Oshlack A. Gene ontology analysis for RNA-seq:  
441 accounting for selection bias. *Genome Biol.* 2010;11(2):R14.
- 442 106. *topGO: topGO: Enrichment analysis for Gene Ontology.* [computer program]. Version R  
443 package version 2.18.0.2010.
- 444 107. *org.Hs.eg.db: Genome wide annotation for Human.* [computer program]. Version R  
445 package version 3.2.3.
- 446 108. Wang X, Terfve C, Rose JC, Markowitz F. HTSanalyzeR: an R/Bioconductor package  
447 for integrated network analysis of high-throughput screens. *Bioinformatics.*  
448 2011;27(6):879-880.
- 449 109. *GSEABase: Gene set enrichment data structures and methods.* [computer program].  
450 Version R package version 1.32.0.
- 451 110. Luo W, Friedman MS, Shedden K, Hankenson KD, Woolf PJ. GAGE: generally  
452 applicable gene set enrichment for pathway analysis. *BMC Bioinformatics.* 2009;10:161.
- 453 111. Wickham H. *ggplot2: Elegant Graphics for Data Analysis.* New York: Springer-Verlag  
454 2009.
- 455 112. *scales: Scale functions for graphics.* [computer program]. Version R package version  
456 0.2.3. 2012.
- 457 113. Wickham H. Reshaping Data with the reshape Package. *Journal of Statistical Software.*  
458 2007;21(12):1-20.
- 459 114. Murrell P. *R Graphics.* Boca Raton, Florida: Chapman and Hall/CRC; 2005.
- 460 115. Conway JR, Lex A, Gehlenborg N. UpSetR: An R Package for the Visualization of  
461 Intersecting Sets and their Properties. *Bioinformatics.* 2017.

- 462 116. *gplots: Various R Programming Tools for Plotting Data* [computer program]. Version  
463 3.0.12016.
- 464 117. *VennDiagram: Generate High-Resolution Venn and Euler Plots* [computer program].  
465 Version 1.6.172016.
- 466 118. Wang M, Roussos P, McKenzie A, et al. Integrative network analysis of nineteen brain  
467 regions identifies molecular signatures and networks underlying selective regional  
468 vulnerability to Alzheimer's disease. *Genome Med.* 2016;8(1):104.
- 469 119. *NetWeaver: Graphic Presentation of Complex Genomic and Network Data Analysis*  
470 [computer program]. 2016.
- 471 120. *CCP: Significance Tests for Canonical Correlation Analysis (CCA)* [computer program].  
472 Version R package version 1.12012.
- 473 121. Dowle M, Srinivasan A. data.table: Extension of `data.frame`. 2019.
- 474 122. Bartolomucci A, La Corte G, Possenti R, et al. TLQP-21, a VGF-derived peptide,  
475 increases energy expenditure and prevents the early phase of diet-induced obesity. *Proc*  
476 *Natl Acad Sci U S A.* 2006;103(39):14584-14589.
- 477 123. Knight EM, Kim SH, Kottwitz JC, et al. Effective anti-Alzheimer Abeta therapy involves  
478 depletion of specific Abeta oligomer subtypes. *Neurol Neuroimmunol Neuroinflamm.*  
479 2016;3(3):e237.
- 480 124. Knight EM, Ruiz HH, Kim SH, et al. Unexpected partial correction of metabolic and  
481 behavioral phenotypes of Alzheimer's APP/PSEN1 mice by gene targeting of  
482 diabetes/Alzheimer's-related Sorcs1. *Acta Neuropathol Commun.* 2016;4:16.
- 483 125. Lambert MP, Velasco PT, Chang L, et al. Monoclonal antibodies that target pathological  
484 assemblies of Abeta. *J Neurochem.* 2007;100(1):23-35.
- 485 126. Tomic JL, Pensalfini A, Head E, Glabe CG. Soluble fibrillar oligomer levels are elevated  
486 in Alzheimer's disease brain and correlate with cognitive dysfunction. *Neurobiol Dis.*  
487 2009;35(3):352-358.
- 488 127. Haure-Mirande JV, Audrain M, Fanutza T, et al. Deficiency of TYROBP, an adapter  
489 protein for TREM2 and CR3 receptors, is neuroprotective in a mouse model of early  
490 Alzheimer's pathology. *Acta Neuropathol.* 2017;134(5):769-788.
- 491 128. Barnes CA. Memory deficits associated with senescence: a neurophysiological and  
492 behavioral study in the rat. *J Comp Physiol Psychol.* 1979;93(1):74-104.
- 493 129. Sunyer B PS, Höger H, Luber G Barnes maze, a useful task to assess spatial reference  
494 memory in the mice. *Protoc Exch.* 2007.
- 495 130. Fakira AK, Portugal GS, Carusillo B, Melyan Z, Moron JA. Increased small conductance  
496 calcium-activated potassium type 2 channel-mediated negative feedback on N-methyl-D-  
497 aspartate receptors impairs synaptic plasticity following context-dependent sensitization  
498 to morphine. *Biol Psychiatry.* 2014;75(2):105-114.
- 499 131. Narayanan M, Huynh JL, Wang K, et al. Common dysregulation network in the human  
500 prefrontal cortex underlies two neurodegenerative diseases. *Mol Syst Biol.* 2014;10:743.
- 501 132. Schadt EE, Monks SA, Drake TA, et al. Genetics of gene expression surveyed in maize,  
502 mouse and man. *Nature.* 2003;422(6929):297-302.
- 503 133. Doss S, Schadt EE, Drake TA, Lusis AJ. Cis-acting expression quantitative trait loci in  
504 mice. *Genome Res.* 2005;15(5):681-691.
- 505 134. Dobrin R, Zhu J, Molony C, et al. Multi-tissue coexpression networks reveal unexpected  
506 subnetworks associated with disease. *Genome Biol.* 2009;10(5):R55.

- 507 135. Zhang W, Zhu J, Schadt EE, Liu JS. A Bayesian partition method for detecting  
508 pleiotropic and epistatic eQTL modules. *PLoS Comput Biol.* 2010;6(1):e1000642.
- 509 136. Millstein J, Winrow CJ, Kasarskis A, et al. Identification of causal genes, networks, and  
510 transcriptional regulators of REM sleep and wake. *Sleep.* 2011;34(11):1469-1477.
- 511 137. Schadt EE, Woo S, Hao K. Bayesian method to predict individual SNP genotypes from  
512 gene expression data. *Nat Genet.* 2012;44(5):603-608.
- 513 138. Tu Z, Keller MP, Zhang C, et al. Integrative analysis of a cross-loci regulation network  
514 identifies App as a gene regulating insulin secretion from pancreatic islets. *PLoS Genet.*  
515 2012;8(12):e1003107.
- 516 139. Roussos P, Mitchell AC, Voloudakis G, et al. A role for noncoding variation in  
517 schizophrenia. *Cell Rep.* 2014;9(4):1417-1429.
- 518 140. Petyuk VA, Chang R, Ramirez-Restrepo M, et al. The human brainome: network analysis  
519 identifies HSPA2 as a novel Alzheimer's disease target. *Brain.* 2018;141(9):2721-  
520 2739.
- 521 141. Carcamo-Orive I, Hoffman GE, Cundiff P, et al. Analysis of Transcriptional Variability  
522 in a Large Human iPSC Library Reveals Genetic and Non-genetic Determinants of  
523 Heterogeneity. *Cell Stem Cell.* 2017;20(4):518-532 e519.
- 524 142. Haroutunian V, Katsel P, Schmeidler J. Transcriptional vulnerability of brain regions in  
525 Alzheimer's disease and dementia. *Neurobiol Aging.* 2009;30(4):561-573.
- 526 143. Lorenzo DN, Badea A, Davis J, et al. A PIK3C3-ankyrin-B-dynactin pathway promotes  
527 axonal growth and multiorganelle transport. *J Cell Biol.* 2014;207(6):735-752.
- 528 144. Li D, Takeda N, Jain R, et al. Hopx distinguishes hippocampal from lateral ventricle  
529 neural stem cells. *Stem Cell Res.* 2015;15(3):522-529.
- 530 145. Bartelt-Kirbach B, Moron M, Glomb M, Beck CM, Weller MP, Golenhofen N.  
531 HspB5/alphaB-crystallin increases dendritic complexity and protects the dendritic arbor  
532 during heat shock in cultured rat hippocampal neurons. *Cell Mol Life Sci.*  
533 2016;73(19):3761-3775.
- 534 146. Qi AQ, Zhang YH, Qi QD, Liu YH, Zhu JL. Overexpressed HspB6 Underlines a Novel  
535 Inhibitory Role in Kainic Acid-Induced Epileptic Seizure in Rats by Activating the  
536 cAMP-PKA Pathway. *Cell Mol Neurobiol.* 2019;39(1):111-122.
- 537 147. Ishigami A, Ohsawa T, Hiratsuka M, et al. Abnormal accumulation of citrullinated  
538 proteins catalyzed by peptidylarginine deiminase in hippocampal extracts from patients  
539 with Alzheimer's disease. *J Neurosci Res.* 2005;80(1):120-128.
- 540 148. Tu R, Grover HM, Kotra LP. Peptidyl Arginine Deiminases and Neurodegenerative  
541 Diseases. *Curr Med Chem.* 2016;23(2):104-114.
- 542 149. Vodrazka P, Korostylev A, Hirschberg A, et al. The semaphorin 4D-plexin-B signalling  
543 complex regulates dendritic and axonal complexity in developing neurons via diverse  
544 pathways. *Eur J Neurosci.* 2009;30(7):1193-1208.
- 545 150. Swiercz JM, Kuner R, Offermanns S. Plexin-B1/RhoGEF-mediated RhoA activation  
546 involves the receptor tyrosine kinase ErbB-2. *J Cell Biol.* 2004;165(6):869-880.
- 547 151. Geerts CJ, Mancini R, Chen N, et al. Tomosyn associates with secretory vesicles in  
548 neurons through its N- and C-terminal domains. *PLoS One.* 2017;12(7):e0180912.
- 549 152. Burns ME, Sasaki T, Takai Y, Augustine GJ. Rabphilin-3A: a multifunctional regulator  
550 of synaptic vesicle traffic. *J Gen Physiol.* 1998;111(2):243-255.



- 551 153. Bartolomucci A, Possenti R, Mahata SK, Fischer-Colbrie R, Loh YP, Salton SR. The  
552 extended granin family: structure, function, and biomedical implications. *Endocr Rev.*  
553 2011;32(6):755-797.
- 554 154. Kim HJ, Denli AM, Wright R, et al. REST Regulates Non-Cell-Autonomous Neuronal  
555 Differentiation and Maturation of Neural Progenitor Cells via Secretogranin II. *J*  
556 *Neurosci.* 2015;35(44):14872-14884.
- 557 155. Gautam V, D'Avanzo C, Berezovska O, Tanzi RE, Kovacs DM. Synaptotagmins interact  
558 with APP and promote Abeta generation. *Mol Neurodegener.* 2015;10:31.
- 559 156. Mori K, Muto Y, Kokuzawa J, et al. Neuronal protein NP25 interacts with F-actin.  
560 *Neurosci Res.* 2004;48(4):439-446.
- 561 157. Depaz IM, Wilce PA. The novel cytoskeleton-associated protein Neuronal protein 22:  
562 elevated expression in the developing rat brain. *Brain Res.* 2006;1081(1):59-64.
- 563 158. Bai Y, Markham K, Chen F, et al. The in vivo brain interactome of the amyloid precursor  
564 protein. *Mol Cell Proteomics.* 2008;7(1):15-34.
- 565 159. Jahn H, Wittke S, Zurbig P, et al. Peptide fingerprinting of Alzheimer's disease in  
566 cerebrospinal fluid: identification and prospective evaluation of new synaptic biomarkers.  
567 *PLoS One.* 2011;6(10):e26540.
- 568 160. Llano DA, Bundela S, Mudar RA, Devanarayan V, Alzheimer's Disease Neuroimaging I.  
569 A multivariate predictive modeling approach reveals a novel CSF peptide signature for  
570 both Alzheimer's Disease state classification and for predicting future disease  
571 progression. *PLoS One.* 2017;12(8):e0182098.
- 572 161. Carrette O, Demalte I, Scherl A, et al. A panel of cerebrospinal fluid potential biomarkers  
573 for the diagnosis of Alzheimer's disease. *Proteomics.* 2003;3(8):1486-1494.
- 574 162. Hendrickson RC, Lee AY, Song Q, et al. High Resolution Discovery Proteomics Reveals  
575 Candidate Disease Progression Markers of Alzheimer's Disease in Human Cerebrospinal  
576 Fluid. *PLoS One.* 2015;10(8):e0135365.
- 577 163. Holtta M, Minthon L, Hansson O, et al. An integrated workflow for multiplex CSF  
578 proteomics and peptidomics-identification of candidate cerebrospinal fluid biomarkers of  
579 Alzheimer's disease. *J Proteome Res.* 2015;14(2):654-663.
- 580 164. Spellman DS, Wildsmith KR, Honigberg LA, et al. Development and evaluation of a  
581 multiplexed mass spectrometry based assay for measuring candidate peptide biomarkers  
582 in Alzheimer's Disease Neuroimaging Initiative (ADNI) CSF. *Proteomics Clin Appl.*  
583 2015;9(7-8):715-731.
- 584 165. Duits FH, Brinkmalm G, Teunissen CE, et al. Synaptic proteins in CSF as potential novel  
585 biomarkers for prognosis in prodromal Alzheimer's disease. *Alzheimers Res Ther.*  
586 2018;10(1):5.
- 587 166. Cocco C, Corda G, Lisci C, et al. VGF peptides as novel biomarkers in Parkinson's  
588 disease. *Cell Tissue Res.* 2020;379(1):93-107.
- 589 167. Brancia C, Noli B, Boido M, et al. TLQP Peptides in Amyotrophic Lateral Sclerosis:  
590 Possible Blood Biomarkers with a Neuroprotective Role. *Neuroscience.* 2018;380:152-  
591 163.
- 592 168. Jiang H, Chen S, Lu N, et al. Reduced serum VGF levels were reversed by antidepressant  
593 treatment in depressed patients. *World J Biol Psychiatry.* 2017;18(8):586-591.
- 594 169. D'Amato F, Noli B, Angioni L, et al. VGF Peptide Profiles in Type 2 Diabetic Patients'  
595 Plasma and in Obese Mice. *PLoS One.* 2015;10(11):e0142333.

- 596 170. Benito E, Valor LM, Jimenez-Minchan M, Huber W, Barco A. cAMP response element-  
597 binding protein is a primary hub of activity-driven neuronal gene expression. *J Neurosci.*  
598 2011;31(50):18237-18250.
- 599 171. Choi SH, Bylykbashi E, Chatila ZK, et al. Combined adult neurogenesis and BDNF  
600 mimic exercise effects on cognition in an Alzheimer's mouse model. *Science.*  
601 2018;361(6406).
- 602 172. Franzmeier N, Ren J, Damm A, et al. The BDNFVal66Met SNP modulates the  
603 association between beta-amyloid and hippocampal disconnection in Alzheimer's disease.  
604 *Mol Psychiatry.* 2019.
- 605 173. Zhang F, Kang Z, Li W, Xiao Z, Zhou X. Roles of brain-derived neurotrophic  
606 factor/tropomyosin-related kinase B (BDNF/TrkB) signalling in Alzheimer's disease. *J*  
607 *Clin Neurosci.* 2012;19(7):946-949.
- 608 174. Harold D, Abraham R, Hollingworth P, et al. Genome-wide association study identifies  
609 variants at CLU and PICALM associated with Alzheimer's disease. *Nat Genet.*  
610 2009;41(10):1088-1093.
- 611 175. Abdul Rahman NZ, Greenwood SM, Brett RR, et al. Mitogen-Activated Protein Kinase  
612 Phosphatase-2 Deletion Impairs Synaptic Plasticity and Hippocampal-Dependent  
613 Memory. *J Neurosci.* 2016;36(8):2348-2354.
- 614 176. Ham JE, Oh EK, Kim DH, Choi SH. Differential expression profiles and roles of  
615 inducible DUSPs and ERK1/2-specific constitutive DUSP6 and DUSP7 in microglia.  
616 *Biochem Biophys Res Commun.* 2015;467(2):254-260.
- 617 177. Glorioso C, Sabatini M, Unger T, et al. Specificity and timing of neocortical  
618 transcriptome changes in response to BDNF gene ablation during embryogenesis or  
619 adulthood. *Mol Psychiatry.* 2006;11(7):633-648.
- 620 178. Banzhaf-Strathmann J, Benito E, May S, et al. MicroRNA-125b induces tau  
621 hyperphosphorylation and cognitive deficits in Alzheimer's disease. *EMBO J.*  
622 2014;33(15):1667-1680.
- 623 179. Corbett BF, You JC, Zhang X, et al. DeltaFosB Regulates Gene Expression and  
624 Cognitive Dysfunction in a Mouse Model of Alzheimer's Disease. *Cell Rep.*  
625 2017;20(2):344-355.
- 626 180. Bonham LW, Evans DS, Liu Y, Cummings SR, Yaffe K, Yokoyama JS.  
627 Neurotransmitter Pathway Genes in Cognitive Decline During Aging: Evidence for  
628 GNG4 and KCNQ2 Genes. *Am J Alzheimers Dis Other Demen.* 2018;33(3):153-165.
- 629 181. Bouter Y, Kacprowski T, Weissmann R, et al. Deciphering the molecular profile of  
630 plaques, memory decline and neuron loss in two mouse models for Alzheimer's disease  
631 by deep sequencing. *Front Aging Neurosci.* 2014;6:75.
- 632 182. Kitano J, Kimura K, Yamazaki Y, et al. Tamalin, a PDZ domain-containing protein, links  
633 a protein complex formation of group 1 metabotropic glutamate receptors and the  
634 guanine nucleotide exchange factor cytohesins. *J Neurosci.* 2002;22(4):1280-1289.
- 635 183. Dumas S, Hunter CJ, Mistry RB, et al. The Kinase Function of MSK1 Regulates BDNF  
636 Signaling to CREB and Basal Synaptic Transmission, But Is Not Required for  
637 Hippocampal Long-Term Potentiation or Spatial Memory. *eNeuro.* 2017;4(1).
- 638 184. Choi YS, Karelina K, Alzate-Correa D, et al. Mitogen- and stress-activated kinases  
639 regulate progenitor cell proliferation and neuron development in the adult dentate gyrus.  
640 *J Neurochem.* 2012;123(5):676-688.

- 641 185. Correa SA, Hunter CJ, Palygin O, et al. MSK1 regulates homeostatic and experience-  
642 dependent synaptic plasticity. *J Neurosci*. 2012;32(38):13039-13051.
- 643 186. Karelina K, Hansen KF, Choi YS, DeVries AC, Arthur JS, Obrietan K. MSK1 regulates  
644 environmental enrichment-induced hippocampal plasticity and cognitive enhancement. *Learn*  
645 *Mem*. 2012;19(11):550-560.
- 646 187. Xiao MF, Xu D, Craig MT, et al. NPTX2 and cognitive dysfunction in Alzheimer's  
647 Disease. *Elife*. 2017;6.
- 648 188. Giralt A, de Pins B, Cifuentes-Diaz C, et al. PTK2B/Pyk2 overexpression improves a  
649 mouse model of Alzheimer's disease. *Exp Neurol*. 2018;307:62-73.
- 650 189. Salazar SV, Cox TO, Lee S, et al. Alzheimer's Disease Risk Factor Pyk2 Mediates  
651 Amyloid-beta-Induced Synaptic Dysfunction and Loss. *J Neurosci*. 2019;39(4):758-772.
- 652 190. Li C, Gotz J. Pyk2 is a Novel Tau Tyrosine Kinase that is Regulated by the Tyrosine  
653 Kinase Fyn. *J Alzheimers Dis*. 2018;64(1):205-221.
- 654 191. Dourlen P, Fernandez-Gomez FJ, Dupont C, et al. Functional screening of Alzheimer risk  
655 loci identifies PTK2B as an in vivo modulator and early marker of Tau pathology. *Mol*  
656 *Psychiatry*. 2017;22(6):874-883.
- 657 192. Davies P, Katzman R, Terry RD. Reduced somatostatin-like immunoreactivity in cerebral  
658 cortex from cases of Alzheimer disease and Alzheimer senile dementia. *Nature*.  
659 1980;288(5788):279-280.
- 660 193. Magistri M, Velmeshev D, Makhmutova M, Faghihi MA. Transcriptomics Profiling of  
661 Alzheimer's Disease Reveal Neurovascular Defects, Altered Amyloid-beta Homeostasis,  
662 and Deregulated Expression of Long Noncoding RNAs. *J Alzheimers Dis*.  
663 2015;48(3):647-665.
